# Supplementary material
Source: PubMed Central journal article supplement (PMC2645953)

**Supporting Information for Substituted 2-Imino-5-arylidene-thiazolidin-4-one Inhibitors of Bacterial Type III Secretion**

*Toni Kline,<sup>1\*</sup> Heather B. Felise,<sup>1\*</sup> Kathleen C. Barry,<sup>1</sup> Stona R. Jackson,<sup>1</sup> Hai V. Nguyen,<sup>1</sup> Samuel I. Miller<sup>1,2,3</sup> Departments of Genome Sciences,<sup>1</sup> Microbiology<sup>2</sup> & Medicine,<sup>3</sup> University of Washington, Seattle, Washington, 98195*

\*address correspondence to either of these authors: Department of Genome Sciences, Box 357710, University of Washington, Seattle, Washington, 98195.

Toni Kline: telephone (206) 543-4720. email: [klinet@u.washington.edu](mailto:klinet@u.washington.edu)  
Heather Felise: telephone (206) 616-5108. email: [hrb@u.washington.edu](mailto:hrb@u.washington.edu)

Contents

Experimental data for intermediates and final compounds not given in the main body of the text

HPLC retention times and conditions for key compounds (Table) and original tracings

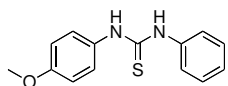

**1-(4-methoxyphenyl)-3-phenylthiourea** was prepared by **General method A** on a 4 mmol scale, using MeOH in place of CH<sub>2</sub>Cl<sub>2</sub>. Yield: 988 mg, 3.88 mmol. <sup>1</sup>H NMR (300 MHz, CDCl<sub>3</sub>, δ): 3.82 (s, 3H), 6.95 (d, *J* = 8.7 Hz, 2H), 7.44-7.21 (m, 6H). <sup>13</sup>C NMR (500 MHz, CDCl<sub>3</sub>, δ): 58.52, 117.81, 128.73, 129.41, 130.79, 132.48, 142.87, 162.12, 184.81. MS *m/z* 259 [M + H]<sup>+</sup>, 281 [M + Na]<sup>+</sup>.

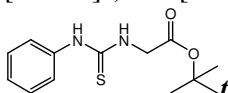

**t-Butyl 2-(3-phenylthioureido)acetate** was prepared by **General method G** on a 1.19 mmol scale, but allowed to react for five hours to go to completion. Yield: 285 mg, 1.07 mmol. <sup>1</sup>H NMR (300 MHz, CD<sub>3</sub>OD, δ): 1.50 (s, 9H), 4.25 (s, 2H), 7.12-7.45 (m, 5H). MS *m/z* 289 [M + Na]<sup>+</sup>.

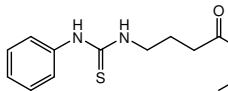

**t-Butyl 4-(3-phenylthioureido)butanoate** was prepared by **method G** on a 1.53 mmol scale, and the crude material taken on without further purification. (<sup>1</sup>H NMR (300 MHz, CDCl<sub>3</sub>, δ): 1.47 (s, 9H), 1.76-1.93 (m, 2H), 1.97-2.15 (m, 2H), 4.96-5.07 (m, 2H), 7.12-7.41 (m, 3H), 7.48 (t, *J* = 7.7 Hz, 2H), 8.01 (br s, 1H), 8.55 (br s, 1H). MS *m/z* 295 [M + H]<sup>+</sup>, 317 [M + Na]<sup>+</sup>.

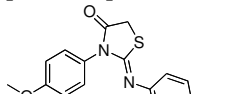

**(Z)-3-(4-methoxyphenyl)-2-(phenylimino)thiazolidin-4-one** was prepared by **General Method B** on a 1.64 mmol scale to give, after silica gel chromatography using a gradient from 0 to 5% MeOH in CH<sub>2</sub>Cl<sub>2</sub>, 487 mg, 1.63 mmol as a mixture of regiomers. <sup>1</sup>H NMR (300 MHz, CDCl<sub>3</sub>, δ): 3.82 (s, 3H, minor isomer), 3.87 (s, 3H, major isomer), 4.0 (s, 2H, major isomer), 4.02 (s, 2H, minor isomer), 6.90-7.16 (m, 4H, major and minor isomers), 7.29-7.57 (m, 5H, major and minor isomers). <sup>13</sup>C NMR (500 MHz, CDCl<sub>3</sub>, δ): 114.32, 114.72, 120.87, 121.94, 124.58, 127.19, 128.94, 129.03, 129.10, 129.34, 148.13, 159.71, 171.62. MS *m/z* 299 [M + H]<sup>+</sup>, 321 [M + Na]<sup>+</sup>.

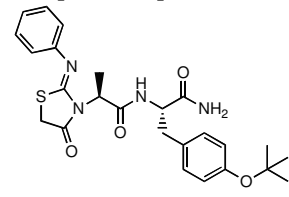

**(S)-N-((S)-1-Amino-3-(4-t-butyloxyphenyl)-1-oxopropan-2-yl)-2-((Z)-4-oxo-2-(phenylimino)thiazolidin-3-yl)propionamide** was prepared by **General method B** on a 0.20 mmol scale, using THF in place of CH<sub>2</sub>Cl<sub>2</sub>, to give, after silica gel chromatography using a gradient from 1 to 10 % MeOH in CHCl<sub>3</sub>, 116 mg (0.20 mmol) product as a white foam. <sup>1</sup>H NMR (300 MHz, CDCl<sub>3</sub>, δ): 1.33 (s, 9H), 1.55 (d, *J* = 11.5 Hz, 3 H), 3.02-3.26 (m, 2H), 3.73 (s, 2H), 4.71 (dd, *J* = 7.3, 6.6 Hz, 1H), 5.15 (dd, *J* = 7.2, 7.0 Hz, 1H), 5.00-5.50 (br, 1H), 6.05-6.07 (br, 2H), 6.91-7.36 (m, 9H). <sup>13</sup>C NMR (500 MHz, CDCl<sub>3</sub>, δ): 17.51, 32.86, 36.64, 40.33, 56.74, 58.05, 82.54, 125.03, 128.18, 128.44, 129.01, 132.01, 133.39, 133.51, 133.60, 133.79, 135.22, 151.26, 157.86, 172.47, 175.51, 177.25. MS *m/z* 483 [M + H]<sup>+</sup>, 505 [M + Na]<sup>+</sup>, 410 [M - *t*-Bu-OH + H]<sup>+</sup>.

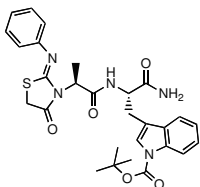

***t*-Butyl 3-((*S*)-3-amino-3-oxo-2-((*S*)-2-((*Z*)-4-oxo-2-(phenylimino)thiazolidin-3-yl)propanamido)propyl)-1H-indole-1-carboxylate** was prepared by **General method B** on a 0.13 mmol scale to give, after silica gel chromatography using a gradient from 1 to 10 % MeOH in CHCl<sub>3</sub>, 39.6 mg (0.07 mmol) product. <sup>1</sup>H NMR (300 MHz, CDCl<sub>3</sub>, δ): 1.57 (d, *J* = 7.0 Hz, 3H), 2.66 (s, 9H), 3.17-3.43 (m, 2H), 3.80 (d, *J* = 5.1 Hz, 2H), 4.86, (dd, *J* = 6.3, 7.6 Hz, 1H), 5.18 (q, *J* = 7.0 Hz, 1H), 5.40 (br, 1H), 6.49 (br, 1H), 6.61 (d, *J* = 8.5 Hz, 1H), 6.87 (d, *J* = 12.5 Hz, 1H), 7.11-7.37 (m, 5H), 7.50 (s, 1H), 7.65 (d, *J* = 12.5 Hz, 1H), 8.15 (d, *J* = 12.6 Hz, 1H). <sup>13</sup>C NMR (500 MHz, CDCl<sub>3</sub>, δ): 17.49, 30.50, 32.22, 36.66, 56.68, 87.95, 119.18, 119.46, 122.96, 124.97, 126.94, 128.52, 128.88, 129.04, 133.39, 134.28, 139.50, 151.20, 153.54, 157.85, 172.46, 175.41, 176.90. MS *m/z* 550.3 [M + H]<sup>+</sup>, 572.3 [M + Na]<sup>+</sup>, 494 [M - *t*-Bu + H]<sup>+</sup>, 516 [M - *t*-Bu + Na]<sup>+</sup>.

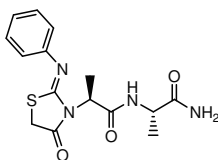

**(*S*)-N-((*S*)-1-Amino-1-oxopropan-2-yl)-2-((*Z*)-4-oxo-2-(phenylimino)thiazolidin-3-yl)propanamide** was prepared by **General Method B** in THF on a 1.49 mmol scale, but allowed to react 3 days to go to completion. The crude solid was purified via silica gel chromatography using a gradient from 1 to 10% MeOH in CH<sub>2</sub>Cl<sub>2</sub> to give 300.0 mg, 0.90 mmol. <sup>1</sup>H NMR (500 MHz, CD<sub>3</sub>OD, δ): 1.41 (d, *J* = 7.2 Hz, 3H), 1.67 (d, *J* = 7.0 Hz, 3H), 3.98 (s, 2H), 4.44 (q, *J* = 7.1 Hz, 1H), 5.24 (q, *J* = 7.0 Hz, 1H), 6.97 (d, *J* = 7.6 Hz, 2H), 7.15 (t, *J* = 7.3 Hz, 1H), 7.36 (t, *J* = 7.7 Hz, 2H). <sup>13</sup>C NMR (500 MHz, CD<sub>3</sub>OD, δ): 16.45, 20.53, 36.45, 53.45, 56.65, 125.48, 129.06, 133.66, 152.77, 159.34, 175.10, 177.36, 181.31. MS *m/z* 357 [M + Na]<sup>+</sup>.

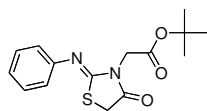

**(*Z*)-*t*-Butyl 2-(4-oxo-2-(phenylimino)thiazolidin-3-yl)acetate** was prepared by **General Method B** in THF on a 1.80 mmol scale to give, after silica gel chromatography using a gradient from 0 to 10% MeOH in CH<sub>2</sub>Cl<sub>2</sub>, 344.4 mg (1.12 mmol) product. <sup>1</sup>H NMR (300 MHz, CDCl<sub>3</sub>, δ): 1.51 (s, 9H), 3.91 (s, 2H), 4.50 (s, 2H), 6.89-7.02 (m, 2H), 7.07-7.21 (m, 1H), 7.29-7.41 (m, 2H). <sup>13</sup>C NMR (500 MHz, CDCl<sub>3</sub>, δ): 32.23, 37.03, 48.71, 87.14, 125.73, 129.49, 134.03, 152.51, 157.55, 170.89, 176.37. MS *m/z* 329 [M + Na]<sup>+</sup>.

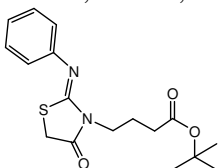

**(*Z*)-*t*-Butyl 4-(4-oxo-2-(phenylimino)thiazolidin-3-yl)butanoate** was prepared by **General method B** in THF, but allowed to react 2 days to go to completion. The crude solid was purified via silica gel chromatography using a gradient from 10 to 50% ethyl acetate in hexane to give **76** (246.2 mg, 0.74 mmol). <sup>1</sup>H NMR (300 MHz, CDCl<sub>3</sub>, δ): 1.47 (s, 9H), 1.64-1.96 (m, 4H), 3.75-3.83 (m, 2H), 4.02 (s, 2H), 7.33 (d, *J* = 7.04 Hz, 2H), 7.39 (d, *J* = 7.21 Hz, 1H), 7.48 (t, *J* = 7.35 Hz, 2H). MS *m/z* 335 [M + H]<sup>+</sup>, 357 [M + Na]<sup>+</sup>.

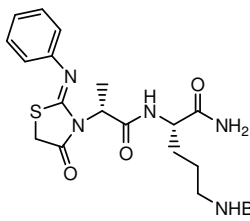

***t*-Butyl(S)-5-amino-5-oxo-4-((R)-2-((Z)-4-oxo-2-(phenylimino)thiazolidin-3-yl)propanamido)pentylcarbamate** was prepared **General method B** in THF on a 0.63 mmol scale, but allowed to react for 3 days to go to completion. The crude solid was purified via silica gel chromatography using a gradient from 0 to 10% MeOH in CH<sub>2</sub>Cl<sub>2</sub> to give 277 mg (0.58 mmol) product. <sup>1</sup>H NMR (300 MHz, CDCl<sub>3</sub>, δ): 1.44 (s, 9H), 1.50-1.71 (m, 3H), 1.73 (d, *J* = 7.1 Hz, 3H), 1.92-2.15 (m, 1H), 3.08-3.41 (m, 2H), 3.89 (d, *J* = 2.6 Hz, 2H), 4.56-4.80 (m, 1H), 5.19 (br s, 1H), 5.28 (q, *J* = 7.0 Hz, 1H), 6.80 (br s, 1H), 6.95 (d, *J* = 7.4 Hz, 2H), 7.17 (t, *J* = 7.4 Hz, 1H), 7.36 (t, *J* = 7.7 Hz, 2H), 7.50 (br s, 2H). MS *m/z* 478 [M + H]<sup>+</sup>, 500 [M + Na]<sup>+</sup>.

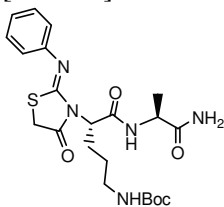

***t*-Butyl(S)-5-((S)-1-amino-1-oxopropan-2-ylamino)-5-oxo-4-((Z)-4-oxo-2-(phenylimino)thiazolidin-3-yl)pentylcarbamate** was prepared by **General method B** in THF on a 0.38 mmol scale, but allowed to react 4 days to go to completion. The crude solid was purified via silica gel chromatography using a gradient from 1 to 10% MeOH in CHCl<sub>3</sub> to give 109.7 mg (0.23 mmol) product. <sup>1</sup>H NMR (300 MHz, CD<sub>3</sub>OD, δ): 1.39 (d, *J* = 7.2 Hz, 3H), 1.44 (s, 9H), 1.48-1.61 (m, 2H), 2.10-2.28 (m, 1H), 2.28-2.47 (m, 1H), 3.13 (t, *J* = 6.5 Hz, 2H), 4.00 (s, 2H), 4.46 (q, *J* = 7.2 Hz, 1H), 5.10-5.70 (m, 1H), 6.95 (d, *J* = 7.5 Hz, 2H), 7.13 (t, *J* = 7.4 Hz, 1H), 7.34 (t, *J* = 7.8 Hz, 2H). <sup>13</sup>C NMR (500 MHz, CD<sub>3</sub>OD, δ): 20.62, 28.30, 29.62, 31.49, 36.26, 43.36, 53.09, 60.46, 82.59, 124.75, 128.37, 132.92, 151.87, 158.69, 161.19, 173.59, 176.85, 180.20. MS *m/z* 478 [M + H]<sup>+</sup>, 500 [M + Na]<sup>+</sup>.

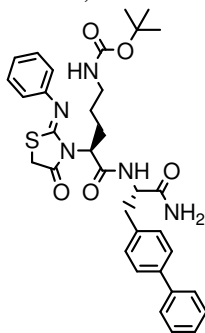

***t*-Butyl(S)-5-amino-N-((S)-1-amino-3-(biphenyl-4-yl)-1-oxopropan-2-yl)-2-((Z)-4-oxo-2-(phenylimino)thiazolidin-3-yl)pentanamide** was prepared by **General method B** in THF on a 0.082 mmol scale, but allowed to react 5 days to go to completion. The crude solid was purified via silica gel chromatography using a gradient from 1 to 10% MeOH in CH<sub>2</sub>Cl<sub>2</sub> to give 47.5 mg (0.075 mmol) product. <sup>1</sup>H NMR (300 MHz, CDCl<sub>3</sub>, δ): 1.39-1.64 (m, 11H), 1.96-2.20 (m, 1H), 2.20-2.41 (m, 1H), 3.00-3.36 (m, 4H), 3.77 (d, *J* = 6.1 Hz, 2H), 4.68-4.96 (m, 1H), 5.07-5.29 (m, 1H), 5.81 (br, 1H), 6.55 (br, 1H), 6.89 (d, *J* = 7.9 Hz, 2H), 7.09-7.24 (m, 1H), 7.24-7.74 (m, 11H). <sup>13</sup>C NMR (500 MHz, CDCl<sub>3</sub>, δ): 28.69, 30.77, 32.45, 36.50, 40.92, 43.76, 58.34, 61.15, 83.39, 125.01, 129.04, 130.96, 131.37, 132.07, 132.83, 133.37, 133.73, 139.78, 143.83, 144.48, 151.16, 158.28, 160.16, 172.50, 175.85, 177.27. MS *m/z* 630 [M + H]<sup>+</sup>, 652 [M + Na]<sup>+</sup>.

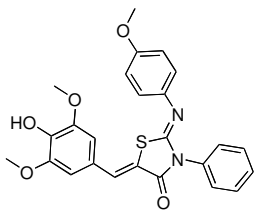

**(2Z,5Z)-5-(4-hydroxy-3,5-dimethoxybenzylidene)-2-(4-methoxyphenylimino)-3-phenylthiazolidin-4-one 26** was prepared by **General method C** from the regiomeric thiazolidinone mixture on a 0.15 mmol scale. Preparative reverse phase HPLC using a gradient of 60-80% B in A over 23 min enabled the separation of **26** (22.9 mg, 0.05 mmol) as one of the two regiomers as well as an overlap band that was held in reserve.  $^1\text{H NMR}$  (300 MHz,  $\text{CDCl}_3$ ,  $\delta$ ): 2.31 (s, 3H), 2.33 (s, 6H), 4.03 (s, 2H), 4.18-4.30 (m, 4H), 4.39-4.44 (m, 5H), 4.64 (s, 1H). HRMS ( $m/z$ ):  $[\text{M} + \text{H}]^+$  calcd for  $\text{C}_{25}\text{H}_{23}\text{N}_2\text{O}_5\text{S}$ , 463.1322; found 463.1322;  $[\text{M} + \text{Na}]^+$  calcd for  $\text{C}_{25}\text{H}_{22}\text{N}_2\text{NaO}_5\text{S}$ , 485.1142; found 485.1153.

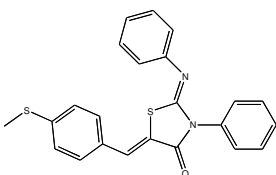

**(2Z,5Z)-5-(4-(methylthio)benzylidene)-3-phenyl-2-(phenylimino)thiazolidin-4-one 27** was prepared by **General method C** from the corresponding *bis*-phenylthiazolidin-4-one on a 0.075 mmol scale. Silica gel chromatography using a gradient of 0-20% ethyl acetate in hexane yielded **27** (14.51 mg, 0.036 mmol).  $^1\text{H NMR}$  (300 MHz,  $\text{CDCl}_3$ ,  $\delta$ ): 2.53 (s, 3H), 7.02, (d,  $J = 7.5$  Hz, 1H), 7.21 (t,  $J = 7.4$  Hz, 2H), 7.28 (d,  $J = 8.3$  Hz, 2H), 7.39-7.60 (m, 8H), 7.81 (s, 1H).  $^{13}\text{C NMR}$  (500 MHz,  $\text{CDCl}_3$ ,  $\delta$ ): 14.95, 119.90, 121.07, 124.83, 125.85, 128.03, 128.89, 129.25, 129.28, 129.41, 129.97, 130.35, 130.95, 134.71, 142.00, 148.26, 150.92, 166.50. HRMS ( $m/z$ ):  $[\text{M} + \text{H}]^+$  calcd for  $\text{C}_{23}\text{H}_{19}\text{N}_2\text{OS}_2$ , 403.0933; found 403.0926;  $[\text{M} + \text{Na}]^+$  calcd for  $\text{C}_{23}\text{H}_{18}\text{N}_2\text{NaOS}_2$ , 425.0753; found 425.0744.

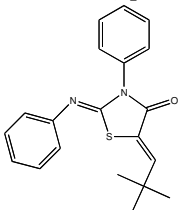

**(2Z,5Z)-5-(2,2-dimethylpropylidene)-3-phenyl-2-(phenylimino)thiazolidin-4-one 28** was prepared by **General method C** from the corresponding *bis*-phenylthiazolidin-4-one on a 0.075 mmol scale. Silica gel chromatography using a gradient of 0-20% ethyl acetate in hexane yielded **28** (4.74 mg, 0.014 mmol).  $^1\text{H NMR}$  (300 MHz,  $\text{CDCl}_3$ ,  $\delta$ ): 1.22 (s, 9H), 6.96-6.98 (m, 2H), 7.07-7.17 (m, 4H), 7.29-7.56 (m, 5H).  $^{13}\text{C NMR}$  (500 MHz,  $\text{CDCl}_3$ ,  $\delta$ ): 28.92, 29.01, 29.67, 29.70, 120.98, 121.07, 124.64, 124.76, 127.93, 128.04, 128.69, 128.80, 128.84, 129.08, 129.17, 129.20, 129.27, 129.42, 145.46, 157.60. HRMS ( $m/z$ ):  $[\text{M} + \text{H}]^+$  calcd for  $\text{C}_{20}\text{H}_{21}\text{N}_2\text{OS}$ , 337.1369; found 337.1361;  $[\text{M} + \text{Na}]^+$  calcd for  $\text{C}_{20}\text{H}_{20}\text{N}_2\text{NaOS}$ , 359.1189; found 359.1180.

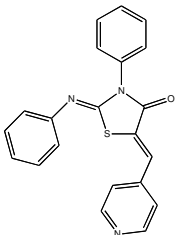

**(2Z,5Z)-3-Phenyl-2-(phenylimino)-5-(pyridin-4-ylmethylene)thiazolidin-4-one 29** was prepared by **General method C** from the corresponding *bis*-phenylthiazolidin-4-one

(Erol, S.; Dogan, I., *Axially chiral 2-arylimino-3-aryl-thiazolidine-4-one derivatives: enantiomeric separation and determination of racemization barriers by chiral HPLC*. *J Org Chem* **2007**, 72, (7), 2494-500) on a 0.075 mmol scale. Silica gel chromatography using a gradient of 0-50% ethyl acetate in hexane yielded **35** (5.63 mg, 0.016 mmol).  $^1\text{H}$  NMR (300 MHz,  $\text{CDCl}_3$ , d): 7.00 (d,  $J = 7.5$  Hz, 2H), 7.23 (t,  $J = 7.4$  Hz, 2H), 7.36-7.43 (m, 5H), 7.50-7.61 (m, 5H), 7.75 (s, 2H), 8.72 (br, 2H).  $^{13}\text{C}$  NMR (500 MHz,  $\text{CDCl}_3$ ,  $\delta$ ): 29.71, 29.80, 120.91, 123.34, 123.38, 125.24, 126.71, 127.91, 127.96, 129.19, 129.38, 129.41, 134.37, 140.79, 147.79, 150.54. HRMS ( $m/z$ ):  $[\text{M} + \text{H}]^+$  calcd for  $\text{C}_{21}\text{H}_{16}\text{N}_3\text{OS}$ , 358.1009; found 358.1001;  $[\text{M} + \text{Na}]^+$  calcd for  $\text{C}_{21}\text{H}_{15}\text{N}_3\text{NaOS}$ , 380.0828; found 380.0819.

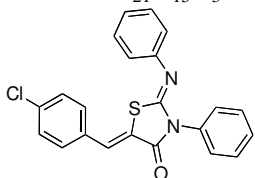

**(2Z,5Z)-5-(4-Chlorobenzylidene)-3-phenyl-2-(phenylimino)thiazolidin-4-one 30** was prepared by **General method C** from the corresponding *bis*-phenylthiazolidin-4-one on a 0.075 mmol scale. Silica gel chromatography using a gradient of 0-35% ethyl acetate in hexane yielded **36** (1.07 mg, 0.0027 mmol).  $^1\text{H}$  NMR (300 MHz,  $\text{CDCl}_3$ ,  $\delta$ ): 6.97 (d,  $J = 7.3$  Hz, 2H), 7.18 (t,  $J = 7.4$  Hz, 1H), 7.35-7.57 (m, 10H), 7.77 (s, 2H).  $^{13}\text{C}$  NMR (500 MHz,  $\text{CDCl}_3$ , d): 121.03, 125.00, 128.01, 129.03, 129.32, 129.36, 130.00, 131.13. HRMS ( $m/z$ ):  $[\text{M} + \text{H}]^+$  calcd for  $\text{C}_{22}\text{H}_{16}\text{ClN}_2\text{OS}$ , 391.0666; found 391.0677;  $[\text{M} + \text{Na}]^+$  calcd for  $\text{C}_{22}\text{H}_{15}\text{ClN}_2\text{NaOS}$ , 413.0486; found 413.0497.

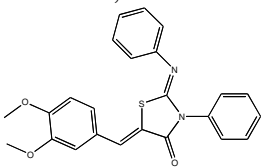

**(2Z,5Z)-5-(3,4-Dimethoxybenzylidene)-3-phenyl-2-(phenylimino)thiazolidin-4-one 31** was prepared by **General method C** from the corresponding *bis*-phenylthiazolidin-4-one on a 0.075 mmol scale. Silica gel chromatography using a gradient of 0-30% ethyl acetate in hexane yielded **31** (11.63 mg, 0.028 mmol).  $^1\text{H}$  NMR (300 MHz,  $\text{CDCl}_3$ ,  $\delta$ ): (s, 3H), 3.91 (s, 3H), 6.91 (d,  $J = 8.4$  Hz, 1H), 6.98-6.99 (m, 3H), 7.10-7.12 (m, 2H), 7.35 (t,  $J = 7.8$  Hz, 2H), 7.44-7.56 (m, 5H), 7.77 (s, 1H).  $^{13}\text{C}$  NMR (500 MHz,  $\text{CDCl}_3$ ,  $\delta$ ): 33.76, 60.05, 60.13, 115.37, 117.30, 122.91, 125.17, 127.45, 128.86, 130.74, 132.06, 132.13, 132.94, 133.02, 133.15, 133.26, 133.35, 135.57, 138.84, 152.34, 153.20, 154.70, 155.14, 170.63. HRMS ( $m/z$ ):  $[\text{M} + \text{H}]^+$  calcd for  $\text{C}_{24}\text{H}_{21}\text{N}_2\text{O}_3$ , 417.1267; found 417.1247;  $[\text{M} + \text{Na}]^+$  calcd for  $\text{C}_{24}\text{H}_{20}\text{N}_2\text{NaO}_3\text{S}$ , 439.1087; found 439.1068.

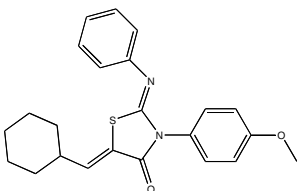

**(2Z,5Z)-5-(Cyclohexylmethylene)-3-(4-methoxyphenyl)-2-(phenylimino)thiazolidin-4-one 32** was prepared by **General method C** from the regiomer thiazolidinone mixture on a 0.067 mmol scale. Preparative reverse phase HPLC using a gradient of 80-95% B in A over 25 min enabled the separation of **32** (4.39 mg, 0.011 mmol) as one of the two regiomers as well **36** (16.88 mg, 0.043 mmol) as a ~1:1 mixture of regiomers.  $^1\text{H}$  NMR (300 MHz,  $\text{CDCl}_3$ ,  $\delta$ ): 1.24 (s, 6H), 1.65 (s, 4H), 2.08 (s, 1H), 3.84 (s, 3H), 6.84 (d,  $J = 9.6$  Hz, 1H), 6.93 (d,  $J = 7.5$  Hz, 2H), 7.03 (d,  $J = 8.7$  Hz, 2H), 7.14 (t,  $J = 7.3$  Hz, 1H), 7.32-7.34 (m, 4H).  $^{13}\text{C}$  NMR (500 MHz,  $\text{CDCl}_3$ ,  $\delta$ ): 25.25, 25.56, 31.15, 41.06, 55.14, 114.64, 121.08, 122.74, 124.69,

127.24, 129.06, 129.14, 140.50, 148.62, 159.63. HRMS ( $m/z$ ):  $[M + H]^+$  calcd for  $C_{23}H_{25}N_2O_2S$ , 393.1631; found 393.1617;  $[M + Na]^+$  calcd for  $C_{23}H_{24}N_2NaO_2S$ , 415.1451; found 415.1434.

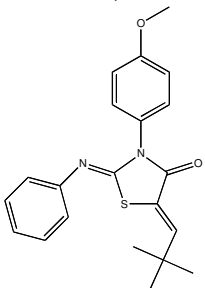

**(2Z,5Z)-5-(2,2-Dimethylpropylidene)-3-(4-methoxyphenyl)-2-(phenylimino)thiazolidin-4-one 33** was prepared by **General method C** from the regiomer thiazolidinone mixture on a 0.067 mmol scale. Preparative reverse phase HPLC using a gradient of 60-95% B in A over 25 min enabled the separation of **33** (4.00 mg, 0.011 mmol) as one of the two compounds as well as **40** (2.68 mg, 0.007 mmol) as a ~1:1 mixture of regiomers.  $^1H$  NMR (300 MHz,  $CDCl_3$ ,  $\delta$ ): 1.19 (s, 9H), 3.84 (s, 3H), 6.93 (d,  $J = 7.4$  Hz, 1H), 7.02-7.03 (m, 2H), 7.13 (t,  $J = 7.4$  Hz, 2H), 7.34-7.31 (m, 5H).  $^{13}C$  NMR (500 MHz,  $CDCl_3$ ,  $\delta$ ): 29.15, 33.90, 55.46, 114.66, 120.34, 121.11, 124.62, 127.32, 128.05, 129.09, 129.14, 145.39, 148.34, 159.63, 166.73. HRMS ( $m/z$ ):  $[M + H]^+$  calcd for  $C_{21}H_{23}N_2O_2S$ , 367.1475; found 367.1474;  $[M + Na]^+$  calcd for  $C_{21}H_{22}N_2NaO_2S$ , 389.1294; found 389.1287.

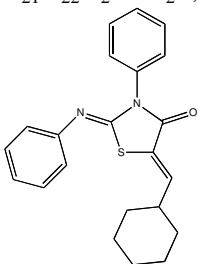

**(2Z,5Z)-5-(Cyclohexylmethylene)-3-phenyl-2-(phenylimino)thiazolidin-4-one 34** was prepared by **General method C** from the corresponding *bis*-phenylthiazolidin-4-one<sup>1</sup> on a 0.089 mmol scale. Silica gel chromatography using a gradient of 0-10% ethyl acetate in hexane yielded **34** (9.64 mg, 0.027 mmol).  $^1H$  NMR (300 MHz,  $CDCl_3$ ,  $\delta$ ): 1.26 (br, 6H), 1.74-1.57 (m, 4H), 2.09 (br, 1H), 6.85 (d,  $J = 9.6$  Hz, 1H), 6.94 (d,  $J = 7.4$  Hz, 3H), 7.13-7.16 (m, 2H), 7.33-7.53 (m, 5H).  $^{13}C$  NMR (500 MHz,  $CDCl_3$ ,  $\delta$ ): 25.26, 25.33, 25.59, 29.70, 31.16, 41.10, 121.04, 122.75, 124.73, 128.00, 128.85, 129.17, 129.26, 134.71, 140.59, 148.54, 151.52, 165.53. HRMS ( $m/z$ ):  $[M + H]^+$  calcd for  $C_{22}H_{23}N_2OS$ , 363.1526; found 363.1525;  $[M + Na]^+$  calcd for  $C_{22}H_{22}N_2NaOS$ , 385.1345; found 385.1346.

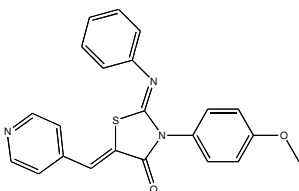

**(2Z,5Z)-3-(4-Methoxyphenyl)-2-(phenylimino)-5-(pyridin-4-ylmethylene)thiazolidin-4-one 35** was prepared by **General method C** from the regiomer thiazolidinone mixture on a 0.067 mmol scale. Preparative reverse phase HPLC using a gradient of 60-80% B in A over 25 min enabled the separation of **35** (3.17 mg, 0.008 mmol) as one of the two compounds as well as an additional 9.3 mg, 0.024 mmol, ~1:1 mixture of regiomers that was held in reserve.  $^1H$  NMR (300 MHz,  $CDCl_3$ ,  $\delta$ ): 3.86 (s, 3H), 6.96 (d,  $J = 7.4$  Hz, 2H), 7.07 (d,  $J = 8.9$  Hz, 2H), 7.19-7.26 (m, 2H), 7.36-7.41 (m, 4H), 7.53-7.55 (m, 2H), 7.74 (s, 1H), 8.75 (s, 2H).  $^{13}C$  NMR (500 MHz,  $CDCl_3$ ,  $\delta$ ): 55.53, 114.81, 120.86, 124.41, 125.46, 125.99, 128.93,

129.45, 147.06, 147.09. HRMS ( $m/z$ ):  $[M + H]^+$  calcd for  $C_{22}H_{18}N_3O_2S$ , 388.1114; found 388.1108;  $[M + Na]^+$  calcd for  $C_{22}H_{17}N_3NaO_2S$ , 410.0934; found 410.0923.

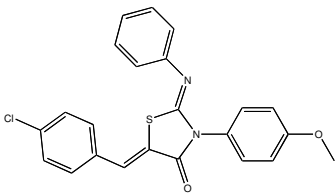

**(2Z,5Z)-5-(4-Chlorobenzylidene)-3-(4-methoxyphenyl)-2-(phenylimino)thiazolidin-4-one 37** was prepared by **General method C** from the regiomer thiazolidinone mixture on a 0.067 mmol scale. Preparative reverse phase HPLC using a gradient of 60-80% B in A over 25 min enabled the purification of, **37** (17.08 mg, 0.041 mmol) as a ~1:1 mixture of regiomers.  $^1H$  NMR (300 MHz,  $CDCl_3$ ,  $\delta$ ) : 3.83 (s, 3H, minor), 3.85 (s, 3H, major), 6.92 (s, 1H, major and minor), 6.96-7.07 (m, 3H, major and minor), 7.16-7.26 (m, 1H, major and minor), 7.35-7.58 (m, 7H, major and minor), 7.77 (s, 1H, major and minor).  $^{13}C$  NMR (500 MHz,  $CDCl_3$ ,  $\delta$ ): 29.73, 55.46, 55.50, 114.53, 114.66, 114.73, 121.09, 122.18, 124.99, 128.00, 128.04, 128.76, 128.84, 128.86, 128.88, 128.90, 128.91, 128.95, 129.01, 129.11, 129.32, 129.36, 129.48, 129.52, 129.54, 129.57, 129.81, 129.89, 129.94, 131.14, 132.19, 135.85, 148.19, 150.96, 159.79, 166.48. HRMS ( $m/z$ ):  $[M + H]^+$  calcd for  $C_{23}H_{18}ClN_2O_2S$ , 421.0772; found 421.0775;  $[M + Na]^+$  calcd for  $C_{23}H_{17}ClN_2NaO_2S$ , 443.0591; found 443.0591.

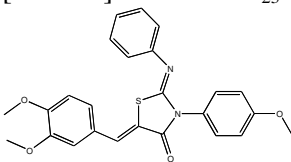

**(2Z,5Z)-5-(3,4-Dimethoxybenzylidene)-3-(4-methoxyphenyl)-2-(phenylimino)thiazolidin-4-one 38** was prepared by **General method C** from the regiomer thiazolidinone mixture on a 0.067 mmol scale. Preparative reverse phase HPLC using a gradient of 60-80% B in A over 23 min gave **38** (23.0 mg, 0.052 mmol) as a ~1:1 mixture of regiomers.  $^1H$  NMR (300 MHz,  $CDCl_3$ ,  $\delta$ ): 3.85 (s, 3H), 3.87 (s, 3H), 3.91 (s, 3H), 6.90-7.19 (m, 8H), 7.33-7.40 (m, 4H), 7.77 (s, 1H).  $^{13}C$  NMR (500 MHz,  $CDCl_3$ ,  $\delta$ ): 55.48, 56.00, 111.32, 113.25, 114.371, 121.20, 121.26, 123.40, 124.86, 126.69, 127.21, 129.16, 129.20, 129.25, 131.59, 148.23, 149.15, 150.66, 159.73, 166.83. HRMS ( $m/z$ ):  $[M + H]^+$  calcd for  $C_{25}H_{23}N_2O_4S$ , 447.1373; found 447.1366;  $[M + Na]^+$  calcd for  $C_{25}H_{22}N_2NaO_4S$ , 469.1192; found 469.1190.

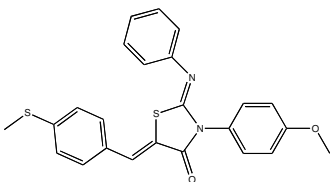

**(2Z,5Z)-3-(4-Methoxyphenyl)-5-(4-(methylthio)benzylidene)-2-(phenylimino)thiazolidin-4-one 39** was prepared by **General method C** from the regiomer thiazolidinone mixture on a 0.067 mmol scale. Preparative reverse phase HPLC using a gradient of 60-80% B in A over 23 min enabled the separation of additional **27** (6.24 mg, 0.014 mmol) as one of the two regiomers as well as **39** (3.47 mg, 0.0080 mmol) as a ~1:1 mixture of regiomers.  $^1H$  NMR (300 MHz,  $CDCl_3$ ,  $\delta$ ): 2.50 (s, 3H), 3.85 (s, 3H), 6.91-7.23 (m, 7H), 7.34-7.41 (m, 6H), 7.77 (s, 1H).  $^{13}C$  NMR (500 MHz,  $CDCl_3$ ,  $\delta$ ): 14.98, 55.47, 114.68, 121.12, 124.80, 125.88, 129.11, 129.24, 130.36, 130.89. HRMS ( $m/z$ ):  $[M + H]^+$  calcd for  $C_{24}H_{21}N_2O_2S_2$ , 433.1039; found 433.1041;  $[M + Na]^+$  calcd for  $C_{24}H_{20}N_2NaO_2S_2$ , 455.0858; found 455.0865.



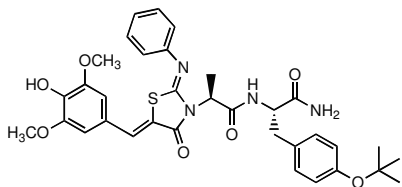

**(S)-N-((S)-1-Amino-3-(4-*tert*-butoxyphenyl)-1-oxopropan-2-yl)-2-((2Z,5Z)-5-(4-hydroxy-3,5-dimethoxybenzylidene)-4-oxo-2-(phenylimino)thiazolidin-3-yl)propanamide** was prepared by **General method C** on a 0.20 mmol scale to give 34 mg (0.05 mmol) product as a bright orange solid that was carried on to the deprotection step without further purification.  $^1\text{H}$  NMR (300 MHz,  $\text{CDCl}_3$ ,  $\delta$ ): 1.60 (d,  $J = 7.0$  Hz, 3 H), 1.35 (s, 9H), 2.89 (br, 2H), 3.07 (dd,  $J = 6.6, 6.7$  Hz, 1H), 3.33 (dd,  $J = 6.6, 6.7$  Hz, 1H), 3.30 (br, 1H), 3.88 (s, 6H), 4.75 (q,  $J = 7.6, 6.6$  Hz, 1H), 5.20 (br, 1H), 5.34 (dd,  $J = 7.0, 7.1$  Hz, 1H), 6.36 (d,  $J = 8.4$  Hz, 2H), 6.68 (s, 2H), 6.94-7.4 (m, 8H), 7.66 (s, 1H). MS  $m/z$  647  $[\text{M} + \text{H}]^+$ , 669  $[\text{M} + \text{Na}]^+$ .

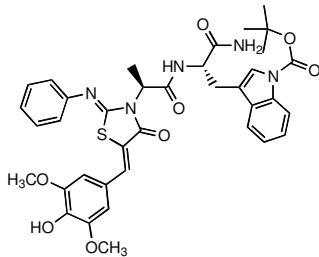

***t*-Butyl 3-((S)-3-amino-2-((S)-2-((2Z,5Z)-5-(4-hydroxy-3,5-dimethoxybenzylidene)-4-oxo-2-(phenylimino)thiazolidin-3-yl)propanamido)-3-oxopropyl)-1H-indole-1-carboxylate** was prepared by **General method C** on a 0.07 mmol scale to give, after purification on silica gel using a gradient from 0 to 20 % MeOH in  $\text{CH}_2\text{Cl}_2$ , 12 mg (0.02mmol) product as a bright orange solid.  $^1\text{H}$  NMR (300 MHz,  $\text{CDCl}_3$ ,  $\delta$ ): 1.57-1.72 (s over m, 12H), 3.24-3.45 (m, 2H), 3.73 (s, 6H), 4.58-4.68 (m, 1H), 5.06-6.10 (m, 1H), 5.80-6.00 (br, 1H), 6.40-7.43 (m, 13H). MS  $m/z$  714  $[\text{M} + \text{H}]^+$ , 736  $[\text{M} + \text{Na}]^+$ .

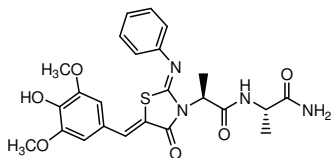

**(S)-N-((S)-1-Amino-1-oxopropan-2-yl)-2-((2Z,5Z)-5-(4-hydroxy-3,5-dimethoxybenzylidene)-4-oxo-2-(phenylimino)thiazolidin-3-yl)propanamide 41.** Compound **41** was prepared by **General method C** on a 0.86 mmol scale. Preparative reverse phase HPLC on 20 mg crude material using a gradient from 10 to 60% B in A over 30 min gave **41** (3.5 mg, 0.007 mmol).  $^1\text{H}$  NMR (500 MHz,  $\text{CD}_3\text{OD}$ ,  $\delta$ ): 1.42, (d,  $J = 7.2$  Hz, 3H), 1.73 (d,  $J = 7.0$  Hz, 3H), 3.84 (s, 6H), 4.47 (q,  $J = 7.2$  Hz, 1H), 5.42 (q,  $J = 7.0$  Hz, 1H), 6.81 (s, 2H), 7.06 (d,  $J = 7.6$  Hz, 2H), 7.22 (t,  $J = 7.4$  Hz, 1H), 7.42 (t,  $J = 7.7$  Hz, 2H), 7.71 (s, 1H).  $^{13}\text{C}$  NMR (500 MHz,  $\text{CD}_3\text{OD}$ ,  $\delta$ ): 16.66, 20.44, 53.21, 56.53, 59.44, 111.62, 121.77, 124.90, 128.46, 128.74, 133.03, 135.80, 142.28, 151.87, 152.20, 153.65, 170.45, 174.00, 180.30. MS  $m/z$  499  $[\text{M} + \text{H}]^+$ , 521  $[\text{M} + \text{Na}]^+$ .

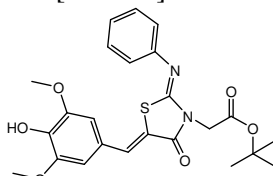

***t*-Butyl 2-((2Z,5Z)-5-(4-hydroxy-3,5-dimethoxybenzylidene)-4-oxo-2-(phenylimino)thiazolidin-3-yl)acetate** was prepared by **General method C** on a 1.12 mmol scale to give, after silica gel chromatography using a gradient from 10 to 50% ethyl acetate in

hexane, 329.8 mg (0.70 mmol) product.  $^1\text{H}$  NMR (300 MHz,  $\text{CDCl}_3$ ,  $\delta$ ): 1.52 (s, 9H), 3.89 (s, 6H), 4.64 (s, 2H), 6.71 (s, 2H), 7.03 (d,  $J = 7.9$  Hz, 2H), 7.15-7.25 (m, 1H), 7.39 (t,  $J = 7.8$  Hz, 2H), 7.72 (s, 1H).  $^{13}\text{C}$  NMR (500 MHz,  $\text{CDCl}_3$ ,  $\delta$ ): 32.06, 48.52, 60.48, 86.62, 111.25, 122.87, 125.20, 128.95, 129.26, 133.31, 136.01, 140.94, 151.29, 151.65, 153.62, 170.01, 170.40. MS  $m/z$  471  $[\text{M} + \text{H}]^+$ , 493  $[\text{M} + \text{Na}]^+$ .

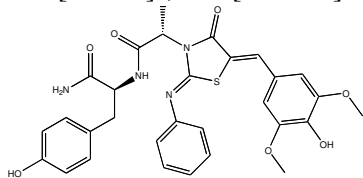

**(S)-N-((S)-1-Amino-3-(4-hydroxyphenyl)-1-oxopropan-2-yl)-2-((2Z,5Z)-5-(4-hydroxy-3,5-dimethoxybenzylidene)-4-oxo-2-(phenylimino)thiazolidin-3-yl)propanamide 43** was obtained by **General method D** on a 0.05 mmole scale and purified on reverse phase HPLC (20 to 95 % B in A over 12 min) to give the product (22 mg, 0.036 mmol) as the TFA salt.  $^1\text{H}$  NMR (500 MHz,  $(\text{CD}_3)_2\text{CO}$ , d): 1.70 (d,  $J = 7.1$  Hz, 3 H), 2.07 (br, 2H), 2.98 (dd,  $J = 7.7, 7.7$  Hz, 1H), 3.09 (dd,  $J = 6.5, 6.5$  Hz, 1H), 3.30 (br, 1H), 3.88 (s, 6H), 4.56 (br, 1H), 4.57 (q,  $J = 7.6, 5.8$  Hz, 1H), 5.32 (dd,  $J = 7.0, 7.1$  Hz, 1H), 6.50 (br, 1H), 6.73 (d,  $J = 8.4$  Hz, 2H), 6.89 (s, 2H), 7.02 (d,  $J = 8.2$  Hz, 2H), 7.10 (d,  $J = 8.4$  Hz, 2H), 7.20 (t,  $J = 7.4$  Hz, 1H), 7.41 (m, 2H), 7.67 (s, 1H). MS  $m/z$  591  $[\text{M} + \text{H}]^+$ , 411  $[\text{M} - \text{Tyr} + \text{H}]^+$ . HRMS ( $m/z$ ):  $[\text{M} + \text{H}]^+$  calcd for  $\text{C}_{30}\text{H}_{31}\text{N}_4\text{O}_7\text{S}$ , 591.1913; found 591.1905;  $[\text{M} + \text{Na}]^+$  calcd for  $\text{C}_{30}\text{H}_{30}\text{N}_4\text{O}_7\text{NaS}$ , 613.1733; found 613.1719.

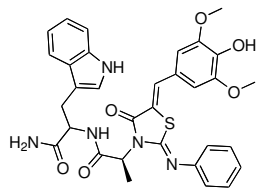

**N-((S)-1-Amino-3-(1H-indol-3-yl)-1-oxopropan-2-yl)-2-((2Z,5Z)-5-(4-hydroxy-3,5-dimethoxybenzylidene)-4-oxo-2-(phenylimino)thiazolidin-3-yl)propanamide 47a** and **(R)-N-((S)-1-amino-3-(1H-indol-3-yl)-1-oxopropan-2-yl)-2-((2Z,5Z)-5-(4-hydroxy-3,5-dimethoxybenzylidene)-4-oxo-2-(phenylimino)thiazolidin-3-yl)propanamide 47b** were obtained by **General method D** on a 0.04 mmole scale and purified on reverse phase HPLC (20 to 95 % B in A over 12 min) to give the products, as the TFA salts, from the earlier-eluting D,L-Ala L-Trp diastereomeric mix **47a** (2.7 mg, 0.004 mmol)  $^1\text{H}$  NMR (500 MHz,  $\text{CD}_3\text{OD}$ ,  $\delta$ ): 1.62 (dd,  $J = 6.6, 6.3$  Hz, 3H), 3.25-3.32 (m, 2H), 3.83 (s, 6H), 4.60-4.65 (m, 1H), 5.25-5.38 (m, 1H), 6.75-8.10 (m, 13H); MS  $m/z$  614  $[\text{M} + \text{H}]^+$ , 636  $[\text{M} + \text{Na}]^+$ , 411  $[\text{M} - \text{Trp} + \text{H}]^+$ ; HRMS ( $m/z$ ):  $[\text{M} + \text{H}]^+$  calcd for  $\text{C}_{32}\text{H}_{31}\text{N}_5\text{O}_6\text{S}$ , 614.2073; found 614.2072;  $[\text{M} + \text{Na}]^+$  calcd for  $\text{C}_{32}\text{H}_{31}\text{N}_5\text{O}_6\text{NaS}$ , 636.1893; found 636.1881; and the later-eluting pure D-Ala L-Trp diastereomer **47b** (1.3 mg, 0.002 mmol).  $^1\text{H}$  NMR (500 MHz,  $\text{CD}_3\text{OD}$ ,  $\delta$ ): 1.60 (d,  $J = 7.0$  Hz, 3H), 3.30-3.34 (m, 2H), 3.85 (s, 6H), 4.62-4.64 (m, 1H), 5.28 (dd,  $J = 7.0, 7.1$  Hz, 1H), 6.68-7.67 (m, 13H); MS  $m/z$  614  $[\text{M} + \text{H}]^+$ , 636  $[\text{M} + \text{Na}]^+$ , 411  $[\text{M} - \text{Trp} + \text{H}]^+$ ; HRMS ( $m/z$ ):  $[\text{M} + \text{H}]^+$  calcd for  $\text{C}_{32}\text{H}_{31}\text{N}_5\text{O}_6\text{S}$ , 614.2073; found 614.2074;  $[\text{M} + \text{Na}]^+$  calcd for  $\text{C}_{32}\text{H}_{31}\text{N}_5\text{O}_6\text{NaS}$ , 636.1893; found 636.1887;  $[\text{M} + \text{K}]^+$  calcd for  $\text{C}_{32}\text{H}_{31}\text{N}_5\text{O}_6\text{KS}$ , 652.1632; found 652.1631.

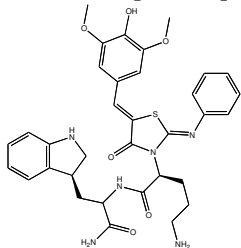

**(S)-5-Amino-N-((S)-1-amino-3-(indolin-3-yl)-1-oxopropan-2-yl)-2-((5Z)-5-(4-hydroxy-3,5-dimethoxybenzylidene)-4-oxo-2-(phenylimino)thiazolidin-3-**

**yl)pentanamide 49b** The protected intermediate dipeptide (168 mg, 0.26 mmol) was dissolved in EtOH/DMF (2mL/2mL), and 10% palladium on carbon (150 mg) was added. Hydrogen gas was bubbled through the solution for 1 h, the catalyst was filtered off, and the filtrate concentrated *in vacuo*. The resulting residue was dissolved in MeOH and filtered through celite, rinsing with MeOH to fully remove the catalyst. After concentrating *in vacuo*, the residue was dissolved in 2 mL MeOH and phenylisothiocyanate (100  $\mu$ L, 53 mmol.) was added. The reaction was stirred for 12h and then concentrated *in vacuo* to yield the thiourea that was dissolved in 5 mL THF, and diisopropylethylamine (90  $\mu$ L, 0.52 mmol) and methyl bromoacetate (35  $\mu$ L, 0.38 mmol) were added. After stirring for 12h, additional diisopropylethylamine (200  $\mu$ L, 1.15mmol) and methyl bromoacetate (100  $\mu$ L, 1.09 mmol) were added and the reaction was let stir for another 24h. Added sat. NaCl (5 mL),  $\text{CHCl}_3$  and rinsed the aqueous layer with  $\text{CHCl}_3$  (3 x 5mL). The resulting organic layers were combined and dried over anhydrous  $\text{Na}_2\text{SO}_4$ , filtered, and concentrated *in vacuo*. The residue was then purified via silica gel chromatography using a gradient from 1 to 6 % MeOH in  $\text{CH}_2\text{Cl}_2$  to give the thiazolidinone (178 mg, 0.25 mmol) as a white solid. The protected 5-arylidene thiazolidinone was obtained via **General method C** on a 0.017 mmol scale. Silica gel chromatography using 0 to 6% MeOH in  $\text{CHCl}_3$  gave 9.0 mg (0.010 mmol) of the penultimate intermediate. **49b** was obtained from the protected 5-arylidene thiazolidinone (12.0 mg, 0.017 mmol) by **General method D**, and purified on reverse phase HPLC (10 to 60% B in A over 25 min) to give **49b** (1.66 mg, 0.0025 mmol) as the TFA salt.  $^1\text{H}$  NMR (500 MHz,  $\text{CD}_3\text{OD}$ ,  $\delta$ ): 1.19 (m, 2H), 1.64-1.80 (m, 2H), 1.95-2.18 (m, 2H), 2.33 (m, 2H), 2.88-2.98 (m, 2H), 3.53 (m, 2H), 3.71 (s, 6H), 3.86 (m, 1H), 4.58 (dd,  $J = 3.1$  Hz, 1H), 5.40 (m, 1H), 6.65 (s, 2H), 6.95-7.30 (m, 9H), 7.59 (s, 1H). MS  $m/z$  330  $[\text{M} + 2\text{H}]^{+2}$ , 659  $[\text{M} + \text{H}]^+$ . HRMS ( $m/z$ ):  $[\text{M} + \text{H}]^+$  calcd for  $\text{C}_{34}\text{H}_{39}\text{N}_6\text{O}_6\text{S}$ , 659.2652; found 659.2646;  $[\text{M} + \text{Na}]^+$  calcd for  $\text{C}_{34}\text{H}_{38}\text{N}_6\text{NaO}_6\text{S}$ , 681.2471; found 681.2466.

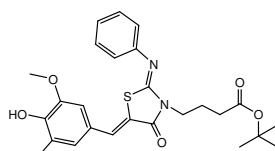

**t-Butyl 4-((2Z,5Z)-5-(4-hydroxy-3,5-dimethoxybenzylidene)-4-oxo-2-(phenylimino)thiazolidin-3-yl)butanoate** was prepared by **General method C** on a 0.74 mmol scale to give, after silica gel chromatography using a gradient from 10 to 75% ethyl acetate in hexane, 190 mg (0.48 mmol) product.  $^1\text{H}$  NMR (300 MHz,  $\text{CDCl}_3$ ,  $\delta$ ): 1.48 (s, 9H), 1.73-2.01 (m, 4H), 3.81-3.93 (m, 2H), 3.99 (s, 6H), 6.84 (s, 2H), 7.36-7.62 (m, 5H), 7.75 (s, 1H).  $^{13}\text{C}$  NMR (500 MHz,  $\text{CDCl}_3$ ,  $\delta$ ): 14.48, 30.86, 32.08, 60.50, 71.33, 85.47, 111.28, 122.53, 129.48, 132.04, 132.45, 132.93, 135.21, 139.09, 140.83, 151.35, 154.28, 170.41, 174.38. MS  $m/z$  499  $[\text{M} + \text{H}]^+$ , 521  $[\text{M} + \text{Na}]^+$ .

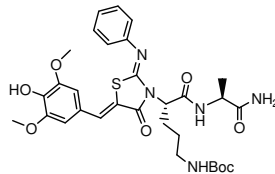

**t-Butyl (S)-5-((S)-1-amino-1-oxopropan-2-ylamino)-4-((2Z,5Z)-5-(4-hydroxy-3,5-dimethoxybenzylidene)-4-oxo-2-(phenylimino)thiazolidin-3-yl)-5-oxopentylcarbamate** was prepared by **General method C** on a 0.23 mmol scale to give, after silica gel chromatography using a gradient from 1 to 10% MeOH in  $\text{CHCl}_3$ , 117 mg (0.18 mmol) product.  $^1\text{H}$  NMR (500 MHz,  $\text{CDCl}_3$ ,  $\delta$ ): 1.44 (s, 12H), 1.50-1.74 (m, 2H), 2.11-2.31 (m, 1H), 2.38-2.57 (m, 1H), 3.10-3.40 (m, 2H), 3.83 (s, 6H), 4.54-4.73 (m, 1H), 5.26-5.45 (m, 1H), 5.75 (br s, 1H), 6.61 (s, 2H), 6.80 (br s, 1H), 7.01 (d,  $J = 7.34$  Hz, 2H), 7.14-7.29 (m, 1H), 7.37 (t,  $J = 7.5$  Hz, 2H), 7.60 (s, 1H).  $^{13}\text{C}$  NMR (500 MHz,  $\text{CDCl}_3$ ,  $\delta$ ): 21.70, 29.16, 30.86, 32.43, 43.81, 53.00, 60.42, 61.21, 83.35, 111.41, 121.83, 125.17, 128.91, 129.22, 133.39, 136.66, 141.32,

151.39, 153.83, 160.24, 170.80, 172.51, 178.70. MS  $m/z$  642 [M + H]<sup>+</sup>.

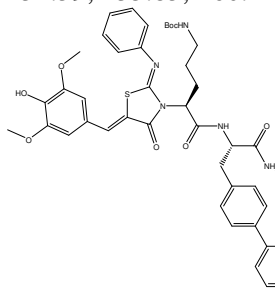

***t*-Butyl (S)-5-((S)-1-amino-3-(biphenyl-4-yl)-1-oxopropan-2-ylamino)-4-((2Z,5Z)-5-(4-hydroxy-3,5-dimethoxybenzylidene)-4-oxo-2-(phenylimino)thiazolidin-3-yl)-5-oxopentylcarbamate** was prepared by **General method C** on a 0.075 mmol scale. The crude solid was purified via silica gel chromatography using a gradient from 0 to 5% MeOH in CH<sub>2</sub>Cl<sub>2</sub> to give 41 mg (0.052 mmol). <sup>1</sup>H NMR (500 MHz, CD<sub>3</sub>OD, δ): 1.41 (s, 9H), 1.46-1.66 (m, 2H), 2.12-2.29 (m, 1H), 2.34-2.52 (m, 1H), 3.00-3.21 (m, 3H), 3.21-3.32 (m, 1H), 3.71 (s, 6H), 4.62-4.75 (m, 1H), 5.24-5.40 (m, 1H), 6.64 (s, 2H), 6.90 (d, *J* = 7.5 Hz, 2H), 7.13 (t, *J* = 7.4 Hz, 1H), 7.21-7.50 (m, 11H), 7.62 (s, 1H). <sup>13</sup>C NMR (500 MHz, CD<sub>3</sub>OD, δ): 28.35, 30.27, 31.45, 40.66, 43.43, 58.66, 59.39, 60.76, 82.57, 111.62, 121.03, 125.00, 128.27, 128.73, 130.35, 130.74, 130.79, 132.32, 132.93, 133.33, 136.34, 140.12, 142.35, 143.37, 144.42, 151.55, 152.12, 153.72, 161.14, 170.61, 173.42, 178.71. MS  $m/z$  795 [M + H]<sup>+</sup>.

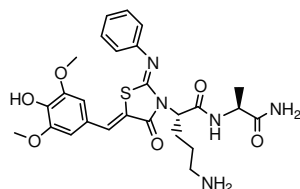

**(S)-5-Amino-N-((S)-1-amino-1-oxopropan-2-yl)-2-((2Z,5Z)-5-(4-hydroxy-3,5-dimethoxybenzylidene)-4-oxo-2-(phenylimino)thiazolidin-3-yl)pentanamide 45** was obtained by **General method D** on a 0.18 mmol scale and purified on reverse phase HPLC (10 to 75 % B in A over 30 min) to give 24.2 mg, 0.037 mmol as the TFA salt. <sup>1</sup>H NMR (300 MHz, CD<sub>3</sub>OD, δ): 1.39 (d, *J* = 7.2 Hz, 3H), 1.62-1.94 (m, 2H), 2.38 (q, *J* = 8.0 Hz, 2H), 2.94-3.11 (m, 2H), 3.84 (s, 6H), 4.44 (q, *J* = 7.2 Hz, 1H), 5.37 (t, *J* = 7.4 Hz, 1H), 6.82 (s, 2H), 7.05 (d, *J* = 7.4 Hz, 2H), 7.22 (t, *J* = 7.4 Hz, 1H), 7.42 (t, *J* = 7.8 Hz, 2H), 7.74 (s, 1H). <sup>13</sup>C NMR (500 MHz, CD<sub>3</sub>OD, δ): 20.70, 28.17, 28.77, 42.99, 53.25, 59.46, 59.99, 111.67, 121.37, 124.84, 128.36, 128.89, 133.07, 136.18, 151.65, 152.21, 153.65, 170.80, 173.07, 180.34. MS  $m/z$  542 [M + H]<sup>+</sup>. HRMS ( $m/z$ ): [M + H]<sup>+</sup> calcd for C<sub>26</sub>H<sub>32</sub>N<sub>5</sub>O<sub>6</sub>S, 542.2068; found 542.2071; [M + Na]<sup>+</sup> calcd for C<sub>26</sub>H<sub>31</sub>N<sub>5</sub>O<sub>6</sub>NaS, 564.1887; found 564.1888.

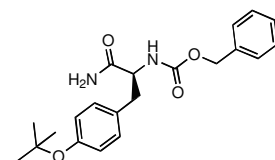

**(S)-Benzyl-1-amino-3-(4-*t*-butoxyphenyl)-1-oxopropan-2-ylcarbamate** by **General method E**. on a 1 mmol scale from (S) Cbz tyrosine *t*-butyl ether DCHA salt to give, after chromatography, 393 mg, 1 mmol. <sup>1</sup>H NMR (300 MHz, CDCl<sub>3</sub>, δ): 1.36 (s, 9H), 3.02 (d, *J* = 6.0 Hz, 2H), 4.43 (m, 1H), 5.08 (s, 2H), 6.92 (d, *J* = 7.5 Hz, 2H), 7.10 (d, *J* = 7.5 Hz, 2H), 7.28-7.37 (m, 5H). <sup>13</sup>C NMR (500 MHz, CDCl<sub>3</sub>, δ): 32.88, 41.86, 59.96, 70.98, 82.45, 128.28, 131.95, 132.18, 132.56, 133.83, 135.43, 140.24, 158.27, 160.24, 178.19. MS  $m/z$  371 [M + H]<sup>+</sup>, 393 [M + Na]<sup>+</sup>.

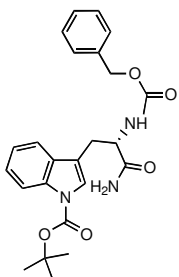

**(S)-*t*-Butyl 3-(3-amino-2-(benzyloxycarbonylamino)-3-oxopropyl)-1H-indole-1-carboxylate** was prepared on a 1.6 mmol scale according to **General method E** to yield, after silica gel chromatography, 382 mg (0.87 mmol) product.  $^1\text{H}$  NMR (300 MHz,  $\text{CDCl}_3$ ,  $\delta$ ): 1.67 (s, 9H), 3.19-3.20 (m, 2H), 4.64-4.65 (m, 1H), 5.06 (s, 1H), 6.15-25 (br, 2H), 7.19-7.63 (m, 5H), 8.01-8.21 (br, 1H). MS  $m/z$  438  $[\text{M} + \text{H}]^+$ , 460  $[\text{M} + \text{Na}]^+$ , 476  $[\text{M} + \text{K}]^+$ , 420  $[\text{M} - t\text{-Bu} + \text{H}]^+$ , 404  $[\text{M} - t\text{-Bu} + \text{Na}]^+$ , 338  $[\text{M} - \text{Boc} + \text{H}]^+$ , 338  $[\text{M} - \text{Boc} + \text{Na}]^+$ .

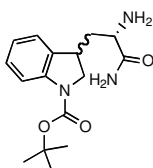

***t*-Butyl 3-((S)-2,3-diamino-3-oxopropyl)indoline-1-carboxylate** was prepared on a 0.64 mmol scale from (S) Fmoc  $\pm$ Dihydrotryptophan(Boc) according to **General method E** followed by N- $\alpha$  deprotection in 20% piperidine in DMF to yield, after silica gel chromatography, 102.89 mg (0.34 mmol) product.  $^1\text{H}$  NMR (300 MHz,  $\text{CDCl}_3$ ,  $\delta$ ): 1.24 (s, 9H), 1.53 (s, 9H), 1.78 (m, 1H), 2.01 (m, 2H), 2.22 (m, 1H), 2.61 (br, 2H), 3.52-3.67 (m, 6H), 4.12 (br, 2H), 6.89-6.92 (m, 4H), 7.13-7.16 (m, 4H).  $^{13}\text{C}$  NMR (500 MHz,  $\text{CDCl}_3$ ,  $\delta$ ): 28.33, 29.64, 36.46, 40.70, 52.99, 53.87, 114.70, 114.80, 122.32, 124.14, 127.92. MS  $m/z$  306  $[\text{M} + \text{H}]^+$ .

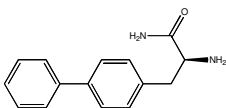

**(S)-2-Amino-3-(biphenyl-4-yl)propanamide** was prepared on a 0.66 mmol scale from Fmoc biphenylalanine according to **General method E** followed by deprotection in 20% piperidine in DMF to yield, after silica gel chromatography, 121 mg (0.50 mmol) product.  $^1\text{H}$  NMR (300 MHz,  $\text{CDCl}_3$ ,  $\delta$ ): 2.78 (dd,  $J = 9.5, 13.7$  Hz, 2H), 3.31 (dd,  $J = 3.9, 13.7$  Hz, 2H), 3.64-3.67 (m, 2H), 5.67 (br, 1H), 7.3-7.36 (m, 2H), 7.42-7.45 (m, 2H), 7.55-7.59 (m, 5H).  $^{13}\text{C}$  NMR (500 MHz,  $\text{CDCl}_3$ ,  $\delta$ ): 29.68, 40.53, 56.40, 126.96, 127.27, 127.44, 128.77, 129.70, 136.80, 139.82, 140.16. MS  $m/z$  241  $[\text{M} + \text{H}]^+$ .

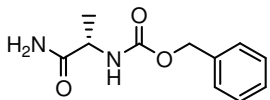

**(S)-Benzyl 1-amino-1-oxopropan-2-ylcarbamate** was prepared on a 2.0 mmol scale according to **General method E** to yield, with no further purification, 411 mg (1.85 mmol) product.  $^1\text{H}$  NMR (300 MHz,  $\text{CD}_3\text{OD}$ ,  $\delta$ ): 1.36 (d,  $J = 7.2$  Hz, 3H), 4.15 (q,  $J = 7.2$  Hz, 1H), 5.11 (s, 2H), 7.11-7.56 (m, 5H). MS  $m/z$  245  $[\text{M} + \text{Na}]^+$ .

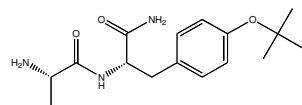

**(S)-2-Amino-N-((S)-1-amino-3-(4-*t*-butoxyphenyl)-1-oxopropan-2-yl)propanamide** was prepared by **General method F** from the N,O-protected tyramide (341 mg, 0.92 mmol) The catalyst was filtered off, and the filtrate concentrated *in vacuo* to give the free amine (173 mg, 0.73 mmol)  $^1\text{H}$  NMR (500 MHz,  $\text{CD}_3\text{OD}$ ,  $\delta$ ): 1.40 (s, 9H), 2.88 (dd,  $J = 7.7$ ,

5.9 Hz, 1 H), 3.10 (dd,  $J = 7.9, 5.9$  Hz, 1 H), 3.70 (dd,  $J = 6.8, 5.6$  Hz, 1H), 7.02 (dd,  $J = 7.7, 1.5$  Hz, 2H), 7.24 (dd,  $J = 6.8, 1.5$  Hz, 2H). MS  $m/z$  237  $[M + H]^+$  that was coupled to Cbz-L-alanine to give the N,O-protected dipeptide (182 mg, 0.41 mmol)  $^1H$  NMR (300 MHz,  $(CD_3)_2CO$ ,  $\delta$ ): 1.29 (d,  $J = 7.2$  Hz, 3H), 1.34 (s, 9H), 2.91 (dd,  $J = 8.3, 5.5$  Hz, 1 H), 3.13 (dd,  $J = 8.8, 5.1$  Hz, 1H), 4.11-4.16 (m, 1H), 4.58-4.65 (m, 1H), 5.07 (d,  $J = 5.8$  Hz, 2H), 6.42 (br, 1H), 6.58 (br, 1H), 6.90 (dd,  $J = 7.7, 1.5$  Hz, 2H), 7.14 (dd,  $J = 7.7, 1.5$  Hz, 2H), 7.36-7.89 (m, 5H). MS  $m/z$  442  $[M + H]^+$ , 425  $[M - NH_2 + H]^+$ , 386  $[M - t-Bu + H]^+$ , 369  $[M - NH_2 - t-Bu + H]^+$  that was deprotected to the O-protected dipeptide (109 mg, 0.36 mmol)  $^1H$  NMR (300 MHz,  $CD_3OD$ ,  $\delta$ ): 1.15 (d,  $J = 7.0$  Hz, 3H), 1.32 (s, 9H), 2.93 (dd,  $J = 8.9, 5.7$  Hz, 1H), 3.17 (dd,  $J = 8.1, 5.7$  Hz, 1H), 3.40 (m, 1H), 4.61 (dd,  $J = 5.7, 3.2$  Hz, 1H), 6.42 (br, 1H), 6.58 (br, 1H), 6.92 (dd,  $J = 6.5, 2.0$  Hz, 2H), 7.18 (d,  $J = 8.4$  Hz, 2H), 7.36-7.89 (m, 5H). MS  $m/z$  308  $[M + H]^+$ , 330  $[M + Na]^+$ , 291  $[M - NH_2 + H]^+$ , 263  $[M - C(CH_3)_3 - NH_2 + H]^+$ .

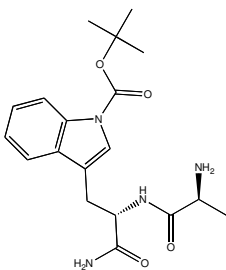

***t*-Butyl 3-((*S*)-3-amino-2-((*S*)-2-aminopropanamido)-3-oxopropyl)-1H-indole-1-carboxylate** was prepared by **General method F** on a 0.83 mmol scale via the deprotection of N,N'-protected tryptophanamide to the free amine (220 mg, 0.73 mmol)  $^1H$  NMR (300 MHz,  $CD_3OD$ ,  $\delta$ ): 1.40 (s, 9H), 2.87-2.90 (m, 1H), 3.50-3.52 (m, 1H), 3.76 (m, 1H), 6.99-7.05 (m, 2H), 7.34 (s, 1H), 7.44-7.46 (m, 1H), 7.83-7.85 (m, 1H); MS  $m/z$  304  $[M + H]^+$ , followed by reaction to the protected dipeptide (153 mg, 0.30 mmol)  $^1H$  NMR (300 MHz,  $(CD_3)_2O$ ,  $\delta$ ): 1.33 (d,  $J = 7.1$  Hz, 3H), 1.67 (s, 9H), 3.10 (dd,  $J = 7.8, 9.7$  Hz, 1H), 3.28 (dd,  $J = 5.1, 9.7$  Hz, 1H), 4.15-4.20 (m, 1H), 4.74 (dt,  $J = 5.5, 8.0, 5.5$  Hz, 1H), 5.05 (d,  $J = 7.1$  Hz, 2H), 6.49 (br, 2H), 7.03 (br, 1H), 7.25-7.72 (m, 10H), 8.14 (m, 1H); MS  $m/z$  510  $[M + H]^+$ , 532  $[M + Na]^+$ , 475  $[M - t-Bu + Na]^+$ ; and finally hydrogenolysis to the  $\alpha$ -amino protected dipeptide amide (90.0 mg, 0.24 mmol)  $^1H$  NMR (300 MHz,  $CD_3OD$ ,  $\delta$ ): 1.41(d,  $J = 6.9$  Hz, 3H), 1.44 (s, 9H), 2.86-3.07 (m, 2H), 3.36 (q,  $J = 6.4$  Hz, 1H), 4.50 (dd,  $J = 6.1, 6.0$  Hz, 1H), 7.07-7.09 (m, 2H), 7.29 (s, 1H), 7.44-7.46 (m, 1H), 7.84-7.86 (m, 1H).  $^{13}C$  NMR (500 MHz,  $CD_3OD$ ,  $\delta$ ): 20.97, 29.78, 49.69, 52.16, 55.50, 86.03, 117.26, 118.51, 121.35, 124.84, 126.46, 126.64, 131.39, 132.86, 137.89, 152.11, 176.48, 177.05. MS  $m/z$  375  $[M + H]^+$ , 397  $[M + Na]^+$ .

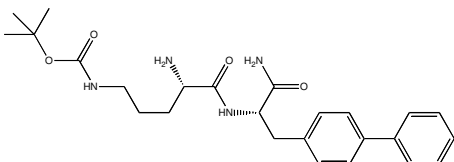

***t*-Butyl (S)-4-amino-5-((S)-1-amino-3-(biphenyl-4-yl)-1-oxopropan-2-ylamino)-5-oxopentylcarbamate** was prepared by **General method F**. Tetrahydrofuran (3 mL) was added to a dry mixture of Cbz L-ornithine (Boc) (27.6 mg, 0.075 mmol) and carbonyldiimidazole (15 mg, 0.093 mmol), and the reaction mixture was allowed to stir for 1 h. To this was added the biphenylalanine amide  $\alpha$ -amine along with diisopropylethylamine (20  $\mu$ L, 0.11 mmol), and the reaction mixture stirred for 18 h until determined complete by TLC (85:15  $CHCl_3/MeOH$ ). A saturated solution of  $NaHCO_3$  (5 mL), water (15 mL), and chloroform (10 mL) were added and the layers were separated. The resulting organic layer was rinsed with a saturated solution of NaCl (10 mL), concentrated *in vacuo*, and purified on silica gel using a gradient from 0 to 10% MeOH in  $CHCl_3$  to give the Cbz-protected

dipeptide (13.26 mg, 0.022 mmol)  $^1\text{H NMR}$  (300 MHz,  $\text{CD}_3\text{OD}$ ,  $\delta$ ): 0.29 (s, 9H), 0.35-0.55 (m, 2H), 0.45-0.65 (m, 2H), 1.86-1.94 (m, 4H), 2.59 (s, 2H), 2.92-2.95 (m, 1H), 3.07-3.09 (m, 1H), 3.54-3.57 (m, 1H), 3.92-3.98 (m, 2H), 6.18-6.29 (m, 9H), 6.38-6.44 (m, 5H). MS  $m/z$  589  $[\text{M} + \text{H}]^+$  which was hydrogenated over 10% palladium on carbon (130 mg) in a mixture of 10 mL EtOH and 1.5 mL DMF for 4 h. The catalyst was filtered off and the filtrate concentrated *in vacuo* to give the free  $\alpha$ -amino dipeptide (MS  $m/z$  455.3  $[\text{M} + \text{H}]^+$ ) which was taken forward without further purification.

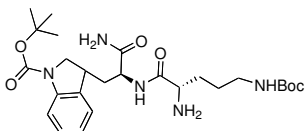

***t*-Butyl 13-((S)-3-amino-2-(S)-2-amino-5-(*t*-butoxycarbonylamino)pentamido)-3-oxopropylindoline-1-carboxylate** was prepared by **General method F**. Tetrahydrofuran (3 mL) was added to a dry mixture of Cbz L-ornithine (Boc) (25.7 mg, 0.070 mmol) and carbonyldiimidazole (14 mg, 0.086 mmol) and the reaction mixture was allowed to stir for 1 h. To this was added the  $\text{N}^{\text{ind}}$ -protected dihydroindole amide  $\alpha$ -amine, along with diisopropylethylamine (20 mL, 0.11 mmol), and the reaction mixture stirred for 18 hours until determined complete by TLC (85:15  $\text{CHCl}_3/\text{MeOH}$ ). A saturated solution of  $\text{NaHCO}_3$  (5 mL), water (15 mL), and chloroform (10 mL) were added and the layers were separated. The resulting organic layer was rinsed with a saturated solution of NaCl (10 mL), concentrated *in vacuo*, and purified on silica gel using a gradient from 0 to 10% MeOH in  $\text{CHCl}_3$  to give the protected intermediate which, upon hydrogenolysis, gave the  $\alpha$ -amine dipeptide (17.68 mg, 0.026 mmol).  $^1\text{H NMR}$  (300 MHz,  $\text{CD}_3\text{OD}$ ,  $\delta$ ): 0.28 (s, 9H), 0.43 (s, 9H), 0.69-0.80 (m, 2H), 0.94-1.05 (m, 2H), 1.93 (t,  $J = 6.5$  Hz, 2H), 2.22 (s, 2H), 2.42-2.6 (m, 2H), 3.33-3.45 (m, 2H), 3.89-3.96 (m, 2H), 5.81-5.83 (m, 2H), 6.02-6.17 (m, 7H), 6.21-6.60 (br, 1H). MS  $m/z$  654  $[\text{M} + \text{H}]^+$ .

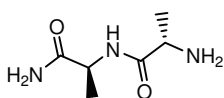

**(S)-2-Amino-N-((S)-1-amino-1-oxopropan-2-yl)propanamide** Cbz-L-alanine (669 mg, 3 mmol) and L-alaninamide (376 mg, 3 mmol) were coupled by the carbonyldiimidazole method to give the protected dipeptide (891 mg, 3.0 mmol).  $^1\text{H NMR}$  (300 MHz,  $\text{DMSO}-d_6$ ,  $\delta$ ): 1.41 (d,  $J = 7.1$  Hz, 6H), 4.21 (t,  $J = 7.2$  Hz, 1H), 4.20 (t,  $J = 7.2$  Hz, 1H), 5.03 (d,  $J = 3.3$  Hz, 2H), 7.02 (s, 2H), 7.30-7.38 (m, 5H), 7.87 (d,  $J = 7.4$  Hz, 1H), 7.88 (d,  $J = 7.5$  Hz, 1H).  $^{13}\text{C NMR}$  (500 MHz,  $\text{DMSO}-d_6$ ,  $\delta$ ): 22.52, 22.92, 52.35, 54.60, 69.85, 132.17, 132.26, 132.83, 141.48, 176.44, 178.57. MS  $m/z$  316  $[\text{M} + \text{Na}]$ . The protected dipeptide was hydrogenated over 10% palladium on carbon (420 mg) in 1:1 EtOH/DMF (55 mL) for 3 h. The catalyst was filtered off and the filtrate concentrated *in vacuo* to give the free  $\alpha$ -amino dipeptide (414 mg, 2.71 mmol).  $^1\text{H NMR}$  (300 MHz,  $\text{CD}_3\text{OD}$ ,  $\delta$ ): 1.29 (d,  $J = 6.9$  Hz, 3H), 1.39 (d,  $J = 6.9$  Hz, 3H), 3.44 (q,  $J = 6.9$  Hz, 1H), 4.35 (q,  $J = 6.7$  Hz, 1H). MS  $m/z$  160  $[\text{M} + \text{H}]^+$ , 182  $[\text{M} + \text{Na}]^+$ .

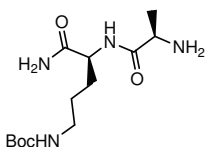

***t*-Butyl (S)-5-amino-4-((R)-2-aminopropanamido)-5-oxopentylcarbamate** was prepared by **General method F** on a 1.82 mmol scale via the free amine that was taken on to the protected dipeptide (545.2 mg, 1.25 mmol)  $^1\text{H NMR}$  (300 MHz,  $\text{CDCl}_3$ ,  $\delta$ ): 1.42 (d,  $J = 7.1$  Hz, 3H), 1.45 (s, 9H), 1.50-1.58 (m, 3H), 1.83-1.99 (m, 1H), 3.01-3.22 (m, 1H), 3.27-3.51 (m,

1H), 4.19-4.37 (m, 1H), 4.52-4.71 (m, 1H), 4.77 (br s, 1H), 5.12 (d,  $J = 2.4$  Hz, 2H), 5.39 (br s, 2H), 6.76 (br s, 1H), 7.05 (br s, 1H), 7.32-7.50 (m, 5H); MS  $m/z$  437  $[M + H]^+$ , 459  $[M + Na]^+$ . This was carried on to the  $\alpha$  amino  $\delta$ -Boc dipeptide amide (281.3 mg, 0.93 mmol).  $^1H$  NMR (300 MHz,  $CD_3OD$ ,  $\delta$ ): 1.29 (d,  $J = 6.9$  Hz, 3H), 1.45 (s, 9H), 1.49-1.76 (m, 3H), 1.78-1.95 (m, 1H), 3.08 (t,  $J = 6.2$  Hz, 2H), 3.48 (q,  $J = 7.0$  Hz, 1H), 4.29-4.44 (m, 1H). MS  $m/z$  303  $[M + H]^+$ , 325.2  $[M + Na]^+$ .

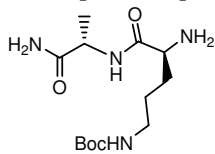

***t*-Butyl(S)-4-amino-5-((S)-1-amino-1-oxopropan-2-ylamino)-5-oxopentylcarbamate** was prepared by **General method F** on a 1.85 mmol scale via alaninamide to the protected dipeptide (222.5 mg, 0.51 mmol)  $^1H$  NMR (300 MHz,  $CDCl_3$ ,  $\delta$ ): 1.41 (d,  $J = 6.87$  Hz, 3H), 1.46 (s, 9H), 1.64-2.02 (m, 4H), 3.01-3.20 (m, 1H), 3.26-3.47 (m, 1H), 4.47 (t,  $J = 7.1$  Hz, 1H), 4.66-4.81 (m, 1H), 5.13 (s, 2H), 5.27 (br s, 1H), 5.59 (br s, 1H), 6.26 (br s, 1H), 6.87 (br s, 1H), 7.32-7.66 (m, 5H); MS  $m/z$  459  $[M + Na]^+$ ; to the  $\alpha$ -amino dipeptide amide (122.4 mg, 0.41 mmol).  $^1H$  NMR (300 MHz,  $CD_3OD$ ,  $\delta$ ): 1.39 (d,  $J = 7.2$  Hz, 3H), 1.44 (s, 9H), 1.50-1.63 (m, 3H), 1.63-1.80 (m, 1H), 3.06 (t,  $J = 6.5$  Hz, 2H), 3.25-3.54 (br, solvent envelope over CH), 4.38 (q,  $J = 7.2$  Hz, 1H). MS  $m/z$  303  $[M + H]^+$ , 325  $[M + Na]^+$ .

#### General method G

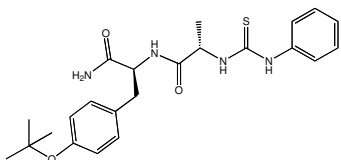

**(S)-N-((S)-1-Amino-3-(4-*tert*-butoxyphenyl)-1-oxopropan-2-yl)-2-(3-phenylthioureido)propanamide** was prepared by **General method G** to give 90 mg, 0.20 mmol that was used without further purification.  $^1H$  NMR (300 MHz,  $(CD_3)_2CO$ ,  $\delta$ ): 1.39 (s, 9H), 1.43 (d,  $J = 7.1$  Hz, 3H), 2.07 (br, 1H), 2.91 (dd,  $J = 9.2, 4.7$  Hz, 1H), 3.19 (dd,  $J = 9.0, 5.0$  Hz, 1H), 4.61-4.63 (m, 1H), 4.86-4.87 (m, 1H), 6.83 (br, 1H), 6.87-6.89 (m, 2H), 7.15-7.69 (m, 7H), 9.42 (br, 2H).  $^{13}C$  NMR (500 MHz,  $(CD_3)_2CO$ ,  $\delta$ ): 21.60, 32.24, 40.71, 57.83, 58.30, 81.67, 127.56, 127.83, 128.89, 132.80, 133.81, 16.53, 158.07, 176.53, 177.64, 184.95. MS  $m/z$  352  $[M - PhNH + H]^+$ , 443  $[M + H]^+$ , 465  $[M + Na]^+$ , 481  $[M + K]^+$ .

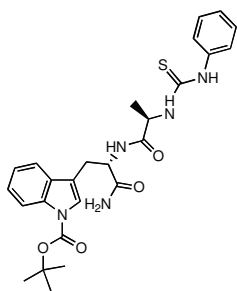

***t*-Butyl 3-((S)-3-amino-3-oxo-2-((S)-2-(3-phenylthioureido)propanamido)propyl)-1H-indole-1-carboxylate** was prepared by **General method G** on a 0.19 mmol scale to give, after silica gel purification using a gradient of 0 to 10% MeOH in  $CHCl_3$  (67 mg, 0.13 mmol) as a colorless oil.  $^1H$  NMR (300 MHz,  $(CD_3)_2CO$ ,  $\delta$ ): 1.26 (d,  $J = 7.0$  Hz, 3H), 1.65 (s, 9H), 3.12 (dd,  $J = 8.3, 6.5$  Hz, 1H), 3.34 (dd,  $J = 9.3, 5.4$  Hz, 1H), 4.78-4.79 (m, 1H), 4.79 (m, 1H), 6.6-6.7 (br, 1H), 7.16-8.14 (m, 10H), 9.14 (br, 1H). MS  $m/z$  510  $[M + H]^+$ , 532  $[M + Na]^+$ .



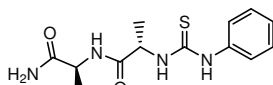

**(S)-N-((S)-1-Amino-1-oxopropan-2-yl)-2-(3-phenylthioureido)propanamide** was prepared by **General method G** on a 1.86 mmol scale to yield 448.9 mg (1.53 mmol) product.  $^1\text{H NMR}$  (300 MHz,  $\text{CD}_3\text{OD}$ ,  $\delta$ ): 1.38 (d,  $J = 6.90$  Hz, 3H), 1.43 (d,  $J = 6.9$  Hz, 3H), 3.34-3.44 (m, 1H), 4.27-4.47 (m, 1H), 7.12-7.56 (m, 5H).  $^{13}\text{C NMR}$  (500 MHz,  $\text{CD}_3\text{OD}$ ,  $\delta$ ): 20.81, 21.19, 53.05, 58.17, 128.56, 129.99, 133.51, 134.29, 178.78, 181.27, 186.08. MS  $m/z$  317  $[\text{M} + \text{Na}]^+$ .

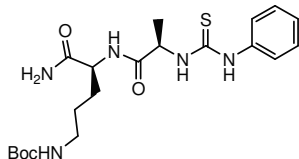

***t*-Butyl(S)-5-amino-5-oxo-4-((R)-2-(3-phenylthioureido)propanamido)pentylcarbamate** was prepared by **General method G** on a 0.93 mmol scale, but allowed to react for 2 days to go to completion to give 274 mg (0.63 mmol) product.  $^1\text{H NMR}$  (300 MHz,  $\text{CD}_3\text{OD}$ ,  $\delta$ ): 1.45 (s, 9H), 1.45 (d,  $J = 6.9$  Hz, 3H), 1.51-1.80 (m, 3H), 1.85-2.20 (m, 1H), 3.08 (t,  $J = 6.6$  Hz, 2H), 4.26-4.40 (m, 1H), 4.94 (q,  $J = 7.1$  Hz, 1H), 7.14-7.25 (m, 1H), 7.32-7.58 (m, 4H). MS  $m/z$  438  $[\text{M} + \text{H}]^+$ , 460  $[\text{M} + \text{Na}]^+$ .

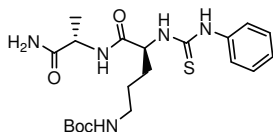

***t*-Butyl(S)-5-((S)-1-amino-1-oxopropan-2-ylamino)-5-oxo-4-(3-phenylthioureido)pentylcarbamate** was prepared by **General method G** on a 0.40 mmol scale to yield 164.5 mg (0.38 mmol) product.  $^1\text{H NMR}$  (300 MHz,  $\text{CDCl}_3$ ,  $\delta$ ): 1.46 (s, 9H), 1.48-1.83 (m, 6H), 1.86-2.04 (m, 1H), 3.04-3.20 (m, 1H), 3.33-3.62 (m, 1H), 4.39-4.57 (m, 1H), 4.80 (br s, 1H), 5.03-5.28 (m, 1H), 5.32 (br s, 1H), 6.31 (br s, 1H), 6.93 (br s, 1H), 7.12 (br s, 1H), 7.30-7.42 (m, 3H), 7.47 (t,  $J = 7.3$  Hz, 2H). MS  $m/z$  438.4  $[\text{M} + \text{H}]^+$ , 460  $[\text{M} + \text{Na}]^+$ .

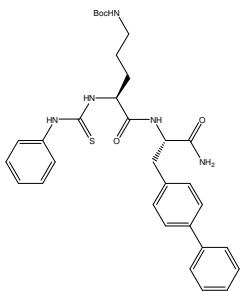

***t*-Butyl(S)-5-((S)-1-amino-3-(biphenyl-4-yl)-1-oxopropan-2-ylamino)-5-oxo-4-(3-phenylthioureido)pentylcarbamate** Crude protected OrnBip dipeptide amide was reacted with phenylisothiocyanate by **General method G** to yield, after silica gel purification using a gradient from 1 to 10% MeOH in  $\text{CH}_2\text{Cl}_2$ , 48 mg (0.08 mmol) product.  $^1\text{H NMR}$  (500 MHz,  $\text{CDCl}_3$ ,  $\delta$ ): 1.48 (s, 9H), 1.64-1.80 (m, 2H), 1.80-1.98 (m, 2H), 2.74-3.36 (m, 4H), 4.58-4.82 (m, 1H), 4.91 (br s, 1H), 5.03-5.34 (m, 1H), 5.92 (br s, 1H), 6.63 (br s, 1H), 7.03-7.72 (m, 14H), 8.37 (br s, 1H). MS  $m/z$  590  $[\text{M} + \text{H}]^+$ , 612.3  $[\text{M} + \text{Na}]^+$ .

## General method H

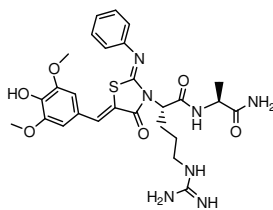

**(S)-N-((S)-1-Amino-1-oxopropan-2-yl)-5-guanidino-2-((2Z,5Z)-5-(4-hydroxy-3,5-dimethoxybenzylidene)-4-oxo-2-(phenylimino)thiazolidin-3-yl)pentanamide 46** was prepared by **General method H** via the ornithine **45** (22 mg, 0.04 mmol) to give the *bis*-Boc-guanidine intermediate that was converted directly to the free guanidine, purified on reverse phase HPLC (10 to 75 % B in A over 30 min) to give **46** (7.1 mg, 0.01 mmol) as the TFA salt.  $^1\text{H}$  NMR (500 MHz,  $\text{CD}_3\text{OD}$ ,  $\delta$ ): 1.35 (d,  $J = 7.2$  Hz, 3H), 1.55-1.81 (m, 2H), 2.20-2.50 (m, 2H), 3.12-3.32 (m, 2H), 3.84 (s, 6H), 4.34-4.55 (m, 1H), 5.38 (t,  $J = 7.5$  Hz, 1H), 6.82 (s, 2H), 7.05 (d,  $J = 7.5$  Hz, 2H), 7.23 (t,  $J = 7.3$  Hz, 1H), 7.42 (t,  $J = 7.8$  Hz, 2H), 7.74 (s, 1H).  $^{13}\text{C}$  NMR (500 MHz,  $\text{CD}_3\text{OD}$ ,  $\delta$ ): 20.70, 28.81, 29.40, 44.62, 53.20, 59.47, 60.22, 111.70, 121.45, 124.80, 128.37, 128.86, 133.07, 136.17, 142.44, 151.71, 152.24, 153.67, 161.24, 170.88, 173.25, 180.33. MS  $m/z$  584  $[\text{M} + \text{H}]^+$ . HRMS ( $m/z$ ): calcd for  $\text{C}_{27}\text{H}_{34}\text{N}_7\text{O}_6\text{S}$ , 584.2286; found 584.2288.

### Scheme 3

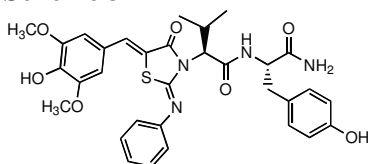

**N-((S)-1-Amino-3-(4-hydroxyphenyl)-1-oxopropan-2-yl)-2-((2Z,5Z)-5-(4-hydroxy-3,5-dimethoxybenzylidene)-4-oxo-2-(phenylimino)thiazolidin-3-yl)-3-methylbutanamide 42**  
 $^1\text{H}$  NMR (500 MHz,  $\text{CD}_3\text{CN}$ ,  $\delta$ ): 0.48 (d,  $J = 6.7$  Hz, 3H), 0.81 (d,  $J = 7.1$  Hz, 3H), 2.0-2.10 (m, 1H), 2.90-3.10 (m, 2H), 3.61 (s, 6H), 3.73 (d,  $J = 4.2$  Hz, 1H), 4.30-4.39 (m, 1H), 5.8 (br, 1H), 6.3 (br, 1H), 6.58 (d,  $J = 10.5$  Hz, 2H), 6.78 (d,  $J = 9.0$  Hz, 2H), 6.92 (s, 2H), 7.43-7.62 (m, 5H), 7.69 (s, 1H). MS  $m/z$  619  $[\text{M} + \text{H}]^+$ , 641  $[\text{M} + \text{Na}]^+$ . HRMS ( $m/z$ ):  $[\text{M} + \text{H}]^+$  calcd for  $\text{C}_{32}\text{H}_{35}\text{N}_4\text{O}_7\text{S}$ , 619.2221; found 619.2216;  $[\text{M} + \text{Na}]^+$  calcd for  $\text{C}_{32}\text{H}_{34}\text{N}_4\text{NaO}_7\text{S}$ , 641.2040; found 641.2033.

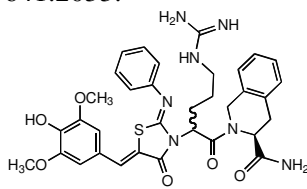

**(S)-2-(5-Guanidino-2-((2Z,5Z)-5-(4-hydroxy-3,5-dimethoxybenzylidene)-4-oxo-2-(phenylimino)thiazolidin-3-yl)pentanoyl)-1,2,3,4-tetrahydroisoquinoline-3-carboxamide 47**  
 $^1\text{H}$  NMR (500 MHz,  $\text{CD}_3\text{CN}$ ,  $\delta$ ): 1.40-1.80 (m, 2H), 1.85-2.00 (m, 1H), 2.00-2.50 (m, 1H), 2.80-3.40 (m, 2H), 3.40-3.95 (m) over 3.66 (s, 8H total), 4.20-4.45 (m, 1H), 4.60-4.80 (m, 2H), 6.40-7.80 (m, 12H). MS  $m/z$  672  $[\text{M} + \text{H}]^+$ . HRMS ( $m/z$ ):  $[\text{M} + \text{H}]^+$  calcd for  $\text{C}_{34}\text{H}_{38}\text{N}_7\text{O}_6\text{S}$ , 672.2599; found 672.2590.

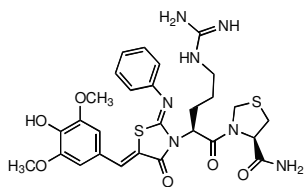

**(R)-3-(5-Guanidino-2-((2Z,5Z)-5-(4-hydroxy-3,5-dimethoxybenzylidene)-4-oxo-2-(phenylimino)thiazolidin-3-yl)pentanoyl)thiazolidine-4-carboxamide 48**

$^1\text{H}$  NMR (500 MHz,  $\text{CD}_3\text{CN}$ ,  $\delta$ ): 1.71-1.85 (m, 2H), 1.96-1.97 (m, 2H), 2.76-2.77 (m, 1H), 3.22 (br, 1H), 3.30-3.31 (m, 1H), 3.62 (s, 3H), 3.83 (s, 2H), 3.94 (s, 1H), 4.47-4.54 (m, 1H), 4.61-4.66 (m, 1H), 4.83-4.90 (m, 1H), 4.96-5.09 (m, 1H), 5.44-5.58 (m, 2H), 5.91-6.02 (m, 1H), 6.82 (s, 1H), 6.92 (s, 1H), 7.09-7.58 (m, 5H), 7.69 (s, 1H). MS  $m/z$  628  $[\text{M} + \text{H}]^+$ . HRMS ( $m/z$ ):  $[\text{M} + \text{H}]^+$  calcd for  $\text{C}_{28}\text{H}_{34}\text{N}_7\text{O}_6\text{S}_2$ , 628.2006; found 628.2018.

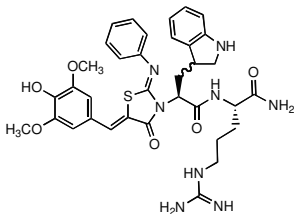

**(2S)-5-Guanidino-2-((2S)-2-((2Z,5Z)-5-(4-hydroxy-3,5-dimethoxybenzylidene)-4-oxo-2-(phenylimino)thiazolidin-3-yl)-3-(indolin-3-yl)propanamido)pentanamide 50**

$^1\text{H}$  NMR (500 MHz,  $\text{CD}_3\text{CN}$ ,  $\delta$ ): 1.60-1.85 (m, 2H), 2.54-2.94 (m, 3H), 3.09-3.16 (m, 3H), 3.50-3.68 (m, 3H), 3.84 (s, 6H), 4.38-4.47 (m, 1H), 5.47-5.60 (m, 1H), 5.82 (br, 1H), 6.83 (s, 2H) over 6.70-7.44 (m, 9H), 7.72 (s, 1H), 7.91 (br, 1H). MS  $m/z$  702  $[\text{M} + \text{H}]^+$ . HRMS ( $m/z$ ):  $[\text{M} + \text{H}]^+$  calcd for  $\text{C}_{35}\text{H}_{41}\text{N}_8\text{O}_6\text{S}$ , 701.2864; found 701.2875

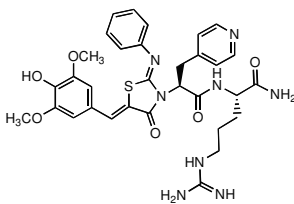

**(S)-5-Guanidino-2-((2Z,5Z)-5-(4-hydroxy-3,5-dimethoxybenzylidene)-4-oxo-2-(phenylimino)thiazolidin-3-yl)-3-(pyridin-4-yl)propanamido)pentanamide 51**

$^1\text{H}$  NMR (500 MHz,  $\text{CD}_3\text{CN}$ ,  $\delta$ ): 1.61-1.75 (m, 2H), 2.76-2.77 (m, 1H), 3.55-3.72 (m, 2H), 3.82 (s, 2H), 3.92 (s, 1H), 4.33-4.52 (m, 1H), 5.65-5.67 (m, 1H), 5.82 (br, 1H), 6.77 (s, 2H), 6.80-7.69 (m, 10H), 7.73 (s, 1H), 8.22-8.46 (br, 1H), 8.47-8.51 (br, 2H). MS  $m/z$  661  $[\text{M} + \text{H}]^+$ . HRMS ( $m/z$ ):  $[\text{M} + \text{H}]^+$  calcd for  $\text{C}_{32}\text{H}_{37}\text{N}_8\text{O}_6\text{S}$ , 661.2551; found 661.2576.

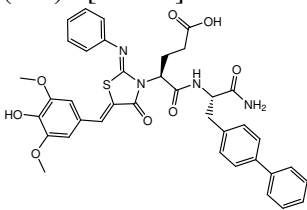

**(S)-5-((S)-1-Amino-3-(biphenyl-4-yl)-1-oxopropan-2-ylamino)-4-((2Z,5Z)-5-(4-hydroxy-3,5-dimethoxybenzylidene)-4-oxo-2-(phenylimino)thiazolidin-3-yl)-5-oxopentanoic acid 53**  $^1\text{H}$  NMR (500 MHz,  $\text{CD}_3\text{OD}$ ,  $\delta$ ): 2.36-2.50 (m, 2H), 2.50-2.71 (m, 2H), 3.02-3.15 (m, 1H), 3.21-3.29 (m, 1H), 3.71 (s, 6H), 4.63-4.74 (m, 1H), 5.33-5.45 (m, 1H), 6.65 (s, 2H), 6.91 (d,  $J = 7.9$  Hz, 2H), 7.13 (t,  $J = 7.4$  Hz, 1H), 7.23-7.38 (m, 9H), 7.40 (d,  $J = 8.0$  Hz, 2H), 7.62 (s, 1H). MS  $m/z$  709  $[\text{M} + \text{H}]^+$ . HRMS ( $m/z$ ):  $[\text{M} + \text{H}]^+$  calcd for  $\text{C}_{38}\text{H}_{37}\text{N}_4\text{O}_8\text{S}$ , 709.2327; found 709.2328.

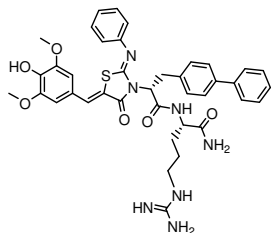

**(S)-2-((R)-3-(Biphenyl-4-yl)-2-((2Z,5Z)-5-(4-hydroxy-3,5-dimethoxybenzylidene)-4-oxo-2-(phenylimino)thiazolidin-3-yl)propanamido)-5-guanidinopentanamide 55b**

$^1\text{H NMR}$  (500 MHz,  $\text{CD}_3\text{OD}$ ,  $\delta$ ): 1.64-1.86 (m, 3H), 2.01-2.15 (m, 1H), 3.13-3.30 (m, 2H), 3.53-3.72 (m, 2H), 3.79 (s, 6H), 4.51-4.62 (m, 1H), 5.67-5.78 (m, 1H), 6.73 (s, 2H), 6.75 (d,  $J = 8.0$  Hz, 2H), 7.14 (t,  $J = 7.4$  Hz, 1H), 7.24-7.37 (m, 5H), 7.42 (t,  $J = 7.5$  Hz, 2H), 7.50-7.62 (m, 4H), 7.66 (s, 1H).  $\text{MS } m/z$  737  $[\text{M} + \text{H}]^+$ .  $\text{HRMS } (m/z)$ :  $[\text{M} + \text{H}]^+$  calcd for  $\text{C}_{39}\text{H}_{42}\text{N}_7\text{O}_6\text{S}$ , 736.2912; found 736.2918.

**HPLC data:**

A 4.6 x 250 mm Alltech C18 5mM reverse phase column was used for all analytical work, run on a Varian HPLC instrument.

All methods refer to a linear gradient of buffer B (0.05% TFA in CH<sub>3</sub>CN) in buffer A (0.05% TFA in H<sub>2</sub>O) at 1 mL/min over the time period stated. Peaks were monitored at the stated wavelength(s).

Methods:

- A 10 to 95% in 10 minutes, 254 nM
- B 20 to 95% in 10 minutes, 215, 262 nM
- C 20 to 95% in 15 minutes, 215, 262 nM
- D 20 to 95% in 10 minutes, 215, 360 nM
- E 65 to 85% in 12 minutes, 215, 360 nM
- F 10 to 85% in 5 minutes, 85 to 95% in 10 minutes, 215, 254 nM
- G 50 to 60% in 15 minutes, 215, 254 nM
- H 10 to 95% in 10 minutes, iso 95% 10 minutes, 215, 254 nM
- I 70 to 95% in 14 minutes, 215, 254 nM
- J 50 to 60% in 15 minutes, 215, 254 nM
- K 60 to 80% in 15 minutes, 215, 254 nM
- L 10 to 60% in 20 minutes, 215, 254 nM

| compound number | retention time (minutes) | purity (%) | method |
|-----------------|--------------------------|------------|--------|
| <b>7</b>        | 8.1                      | 99         | E      |
| <b>8</b>        | 8.5                      | 95         | D      |
| <b>12</b>       | 9.3                      | 95         | D      |
| <b>23</b>       | 11.0                     | 98         | A      |
| <b>24</b>       | 14.6                     | 99         | A      |
| <b>25</b>       | 11.1                     | 97         | A      |
| <b>26</b>       | 16.2                     | 96         | J      |
| <b>27</b>       | 17.3                     | 90         | H      |
| <b>28</b>       | 17.8                     | 94         | I      |
| <b>31</b>       | 15.9                     | 94         | I      |
| <b>36</b>       | 20.1                     | 96         | I      |
| <b>33</b>       | 18.7                     | 93         | I      |
| <b>34</b>       | 20.0                     | 91         | I      |
| <b>29</b>       | 13.8                     | 93         | J      |
| <b>30</b>       | 11.4                     | 92         | H      |
| <b>6</b>        | 8.5                      | 90         | D      |
| <b>36</b>       | 19.6                     | 98         | I      |
| <b>35</b>       | 13.9                     | 95         | J      |
| <b>37</b>       | 16.2                     | 96         | J      |
| <b>38</b>       | 15.6                     | 97         | I      |
| <b>39</b>       | 12.9, 13.5               | 98         | K      |
| <b>40</b>       | 18.5, 18.7               | 96         | I      |
| <b>41</b>       | 10.3                     | 97         | A      |
| <b>42</b>       | 13.7                     | 96         | C      |
| <b>43</b>       | 11.9                     | 99         | C      |
| <b>44a</b>      | 12.6, 13.6               | 38, 62     | C      |

|            |      |    |   |
|------------|------|----|---|
| <b>44b</b> | 13.6 | 80 | C |
| <b>20a</b> | 8.6  | 95 | A |
| <b>20b</b> | 8.8  | 97 | A |
| <b>22a</b> | 8.9  | 96 | A |
| <b>22b</b> | 9.0  | 99 | A |
| <b>45</b>  | 8.2  | 91 | A |
| <b>46</b>  | 8.5  | 95 | A |
| <b>47</b>  | 8.5  | 93 | C |
| <b>48</b>  | 8.7  | 93 | B |
| <b>49a</b> | 13.9 | 95 | L |
| <b>49b</b> | 14.1 | 95 | L |
| <b>50</b>  | 7.0  | 83 | B |
| <b>51</b>  | 6.5  | 90 | B |
| <b>52</b>  | 9.7  | 98 | A |
| <b>53</b>  | 11.0 | 95 | A |
| <b>54</b>  | 11.6 | 95 | C |
| <b>55a</b> | 10.2 | 97 | B |
| <b>55b</b> | 11.0 | 96 | A |
| <b>56</b>  | 10.0 | 96 | B |
|            |      |    |   |
|            |      |    |   |
|            |      |    |   |
|            |      |    |   |

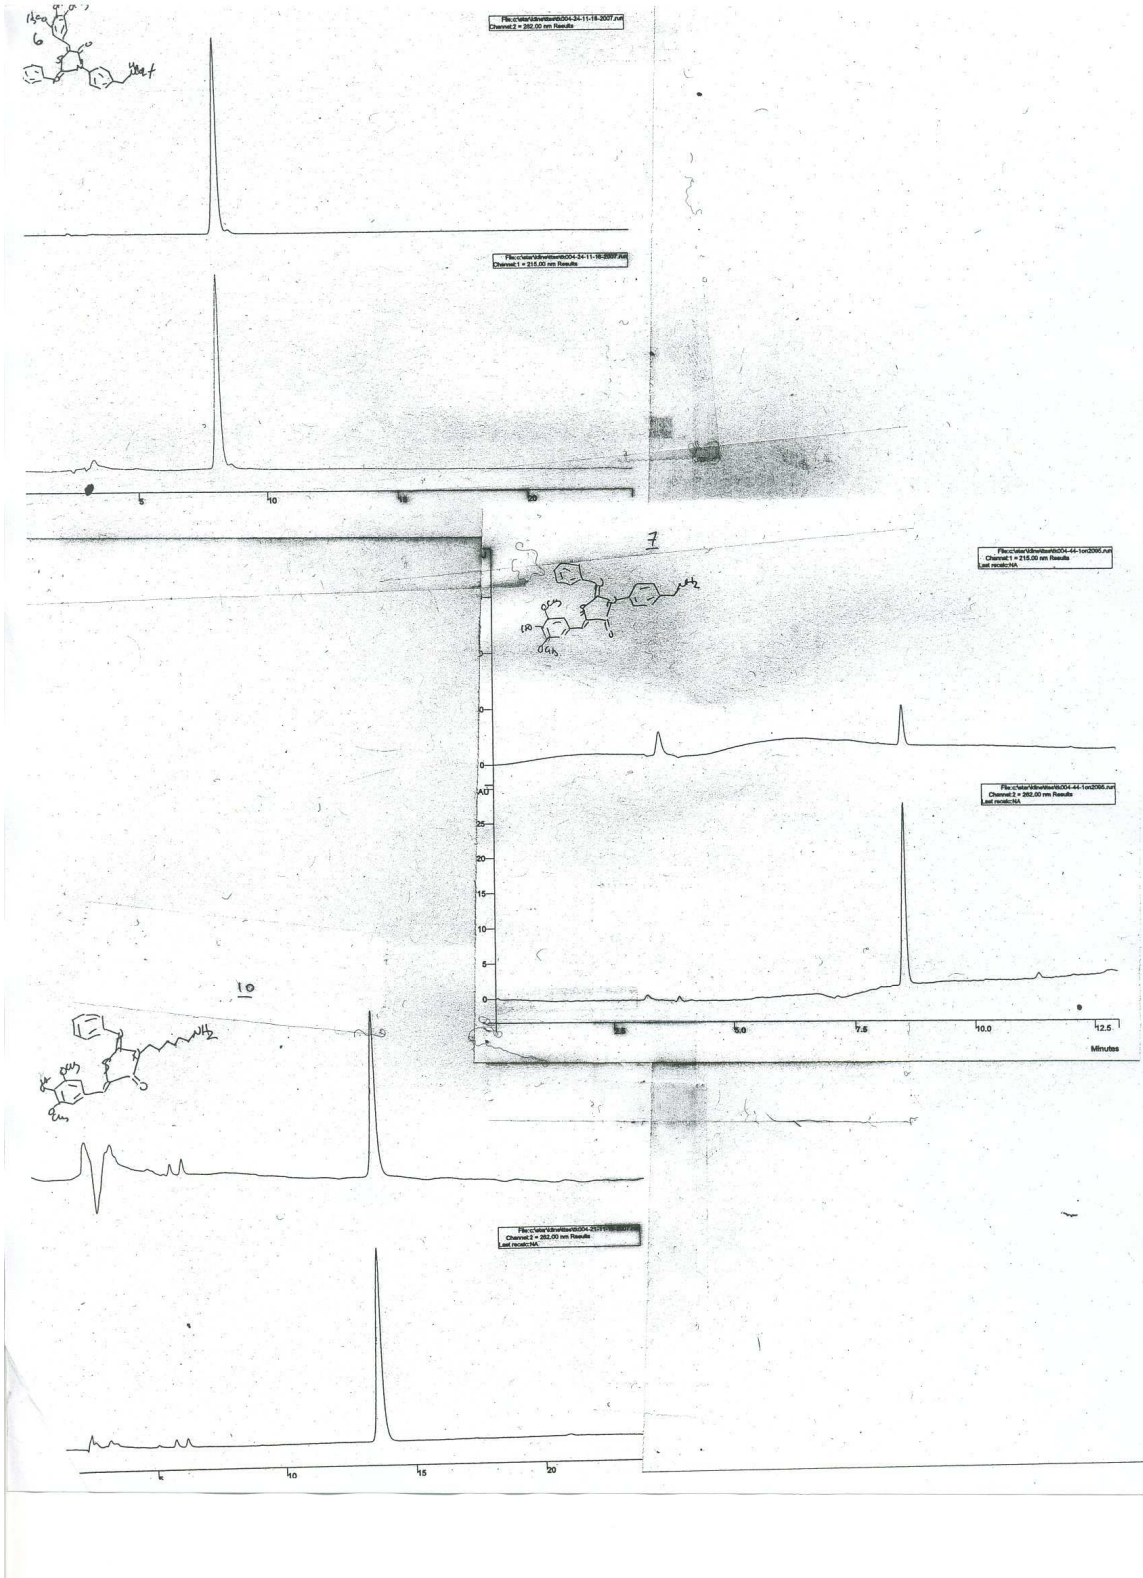

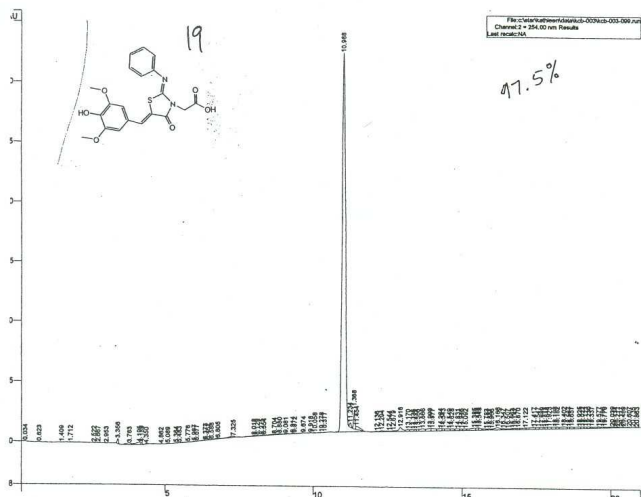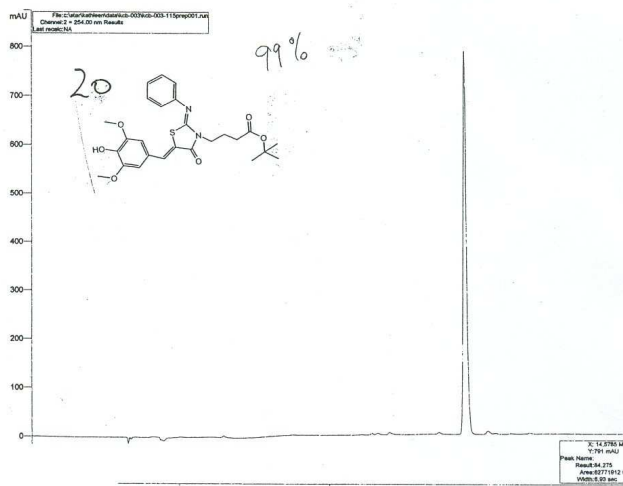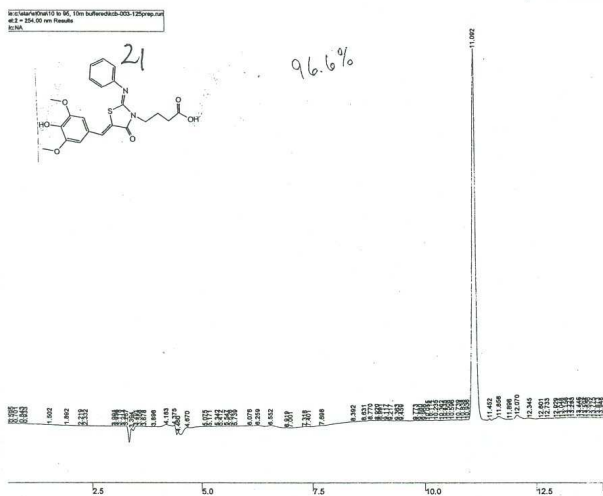



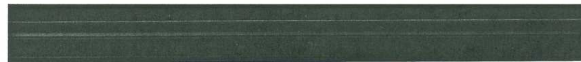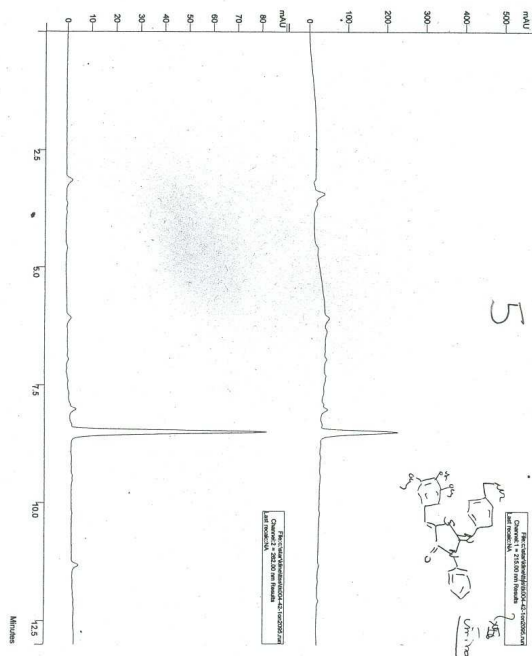

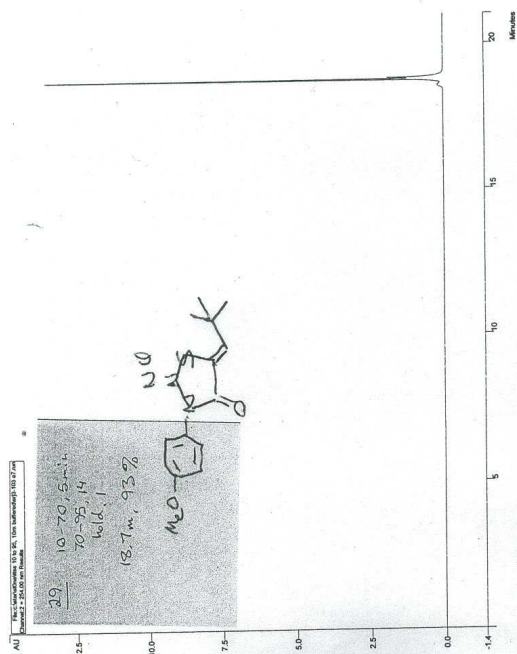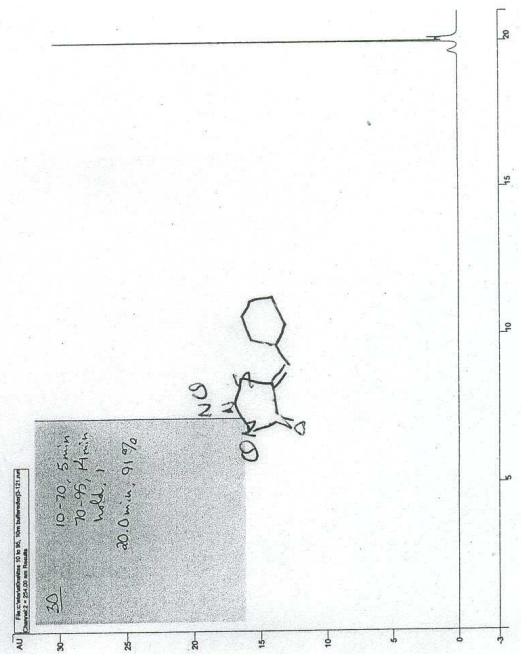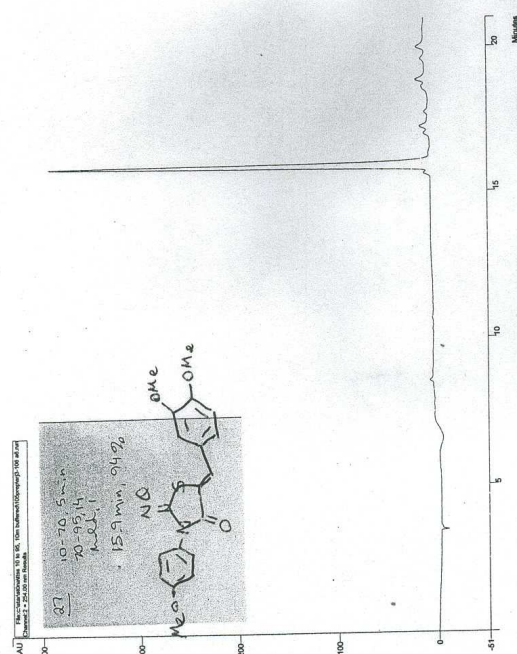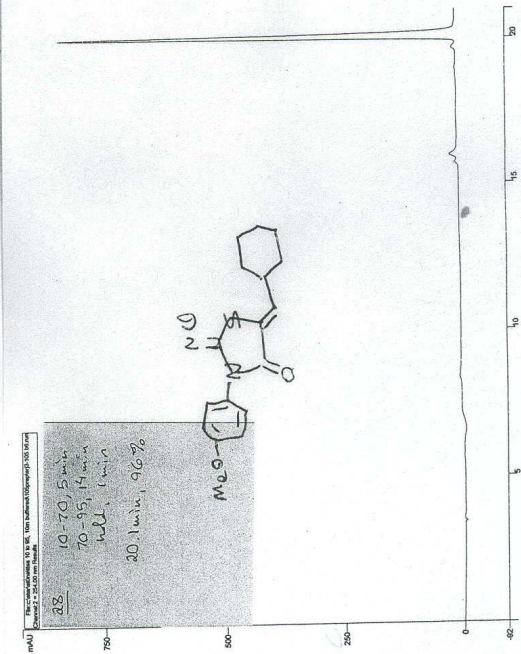

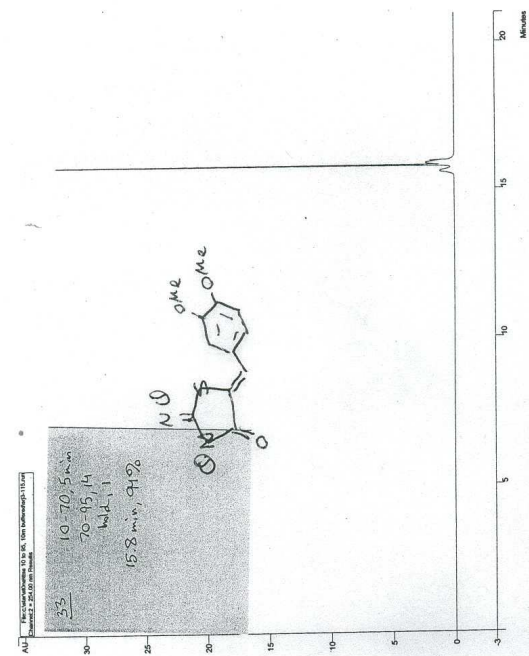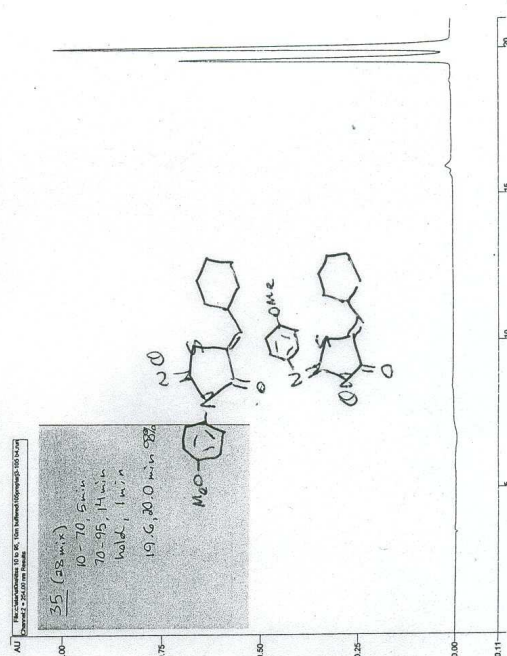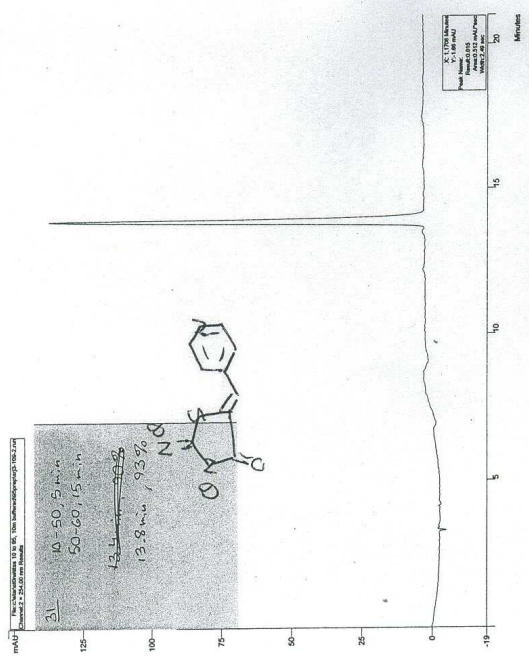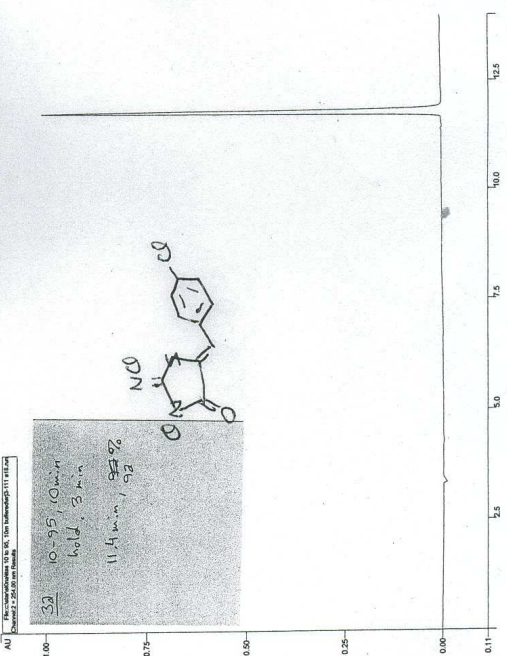



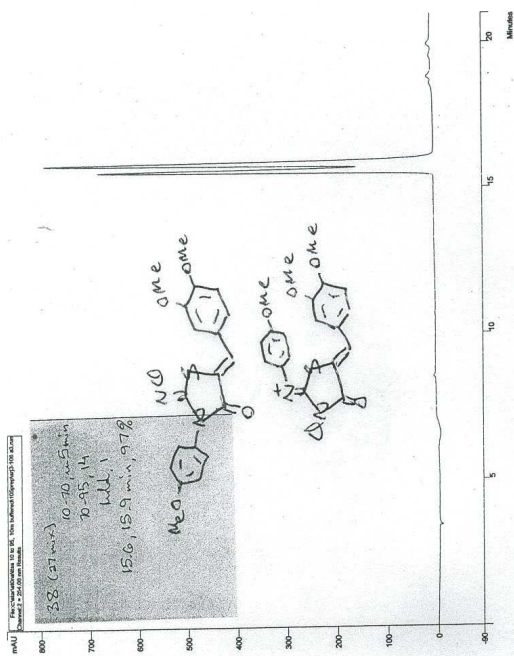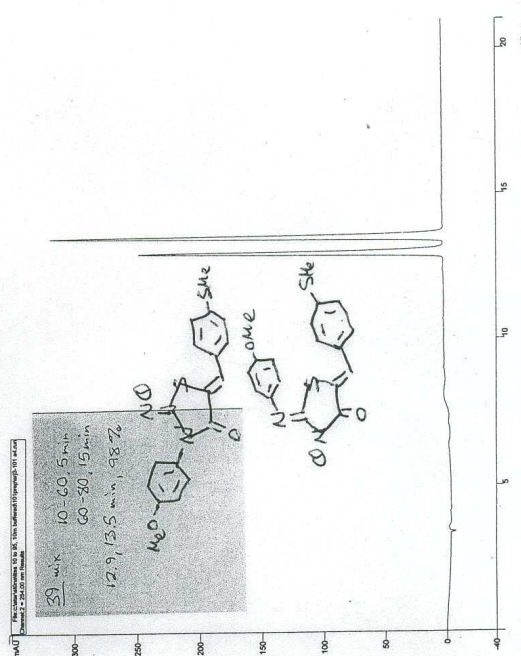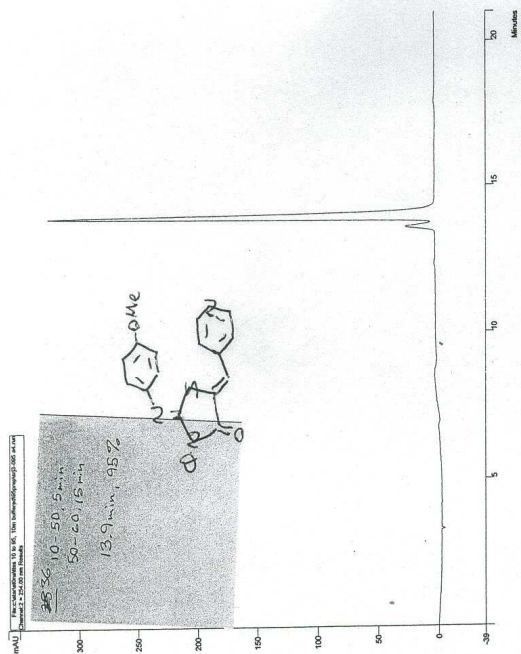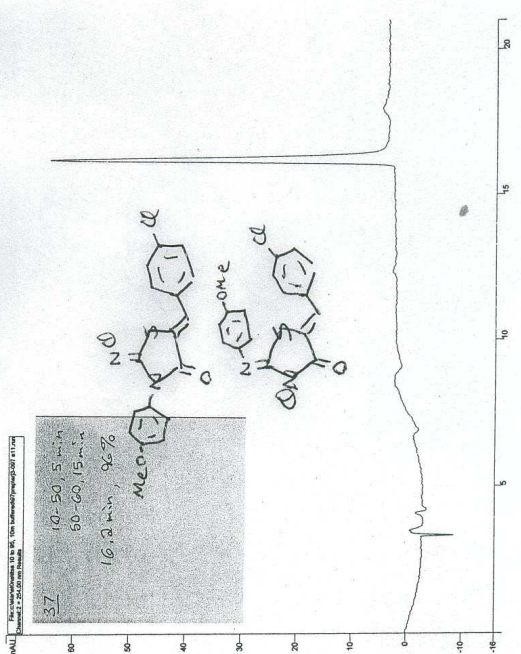

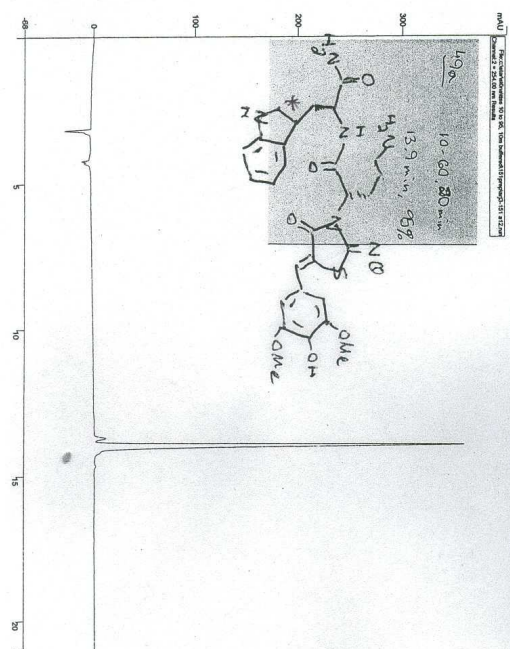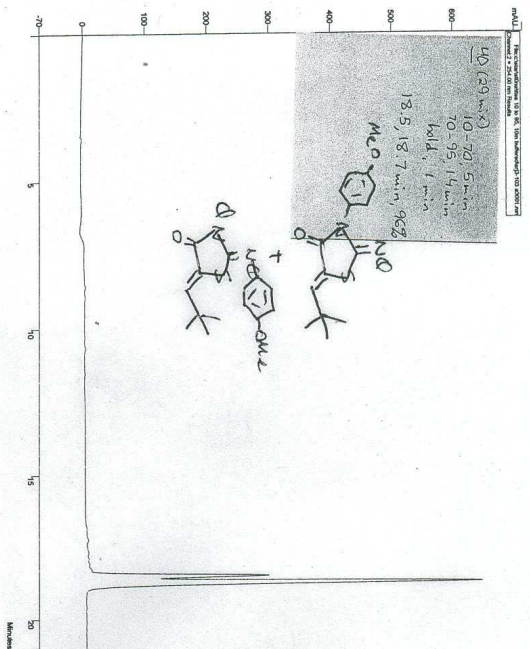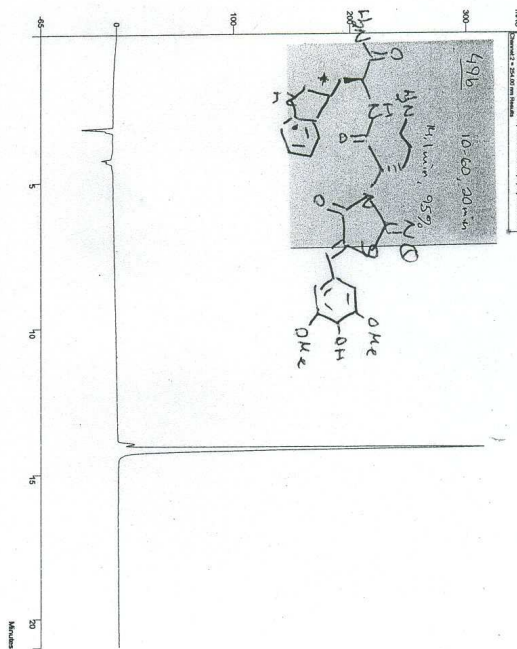

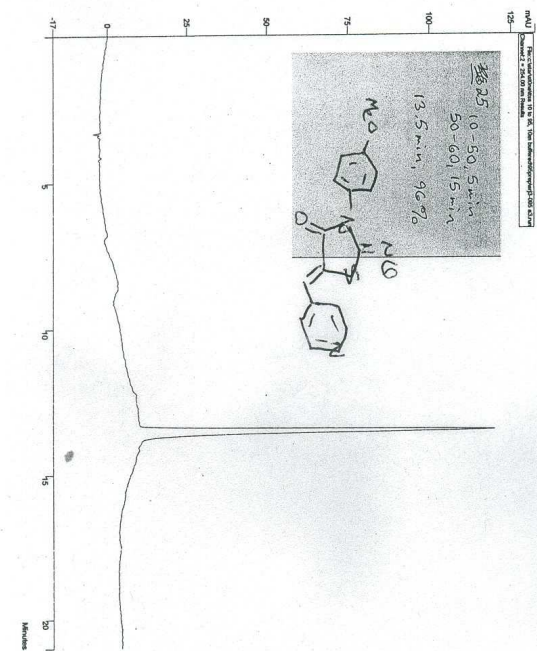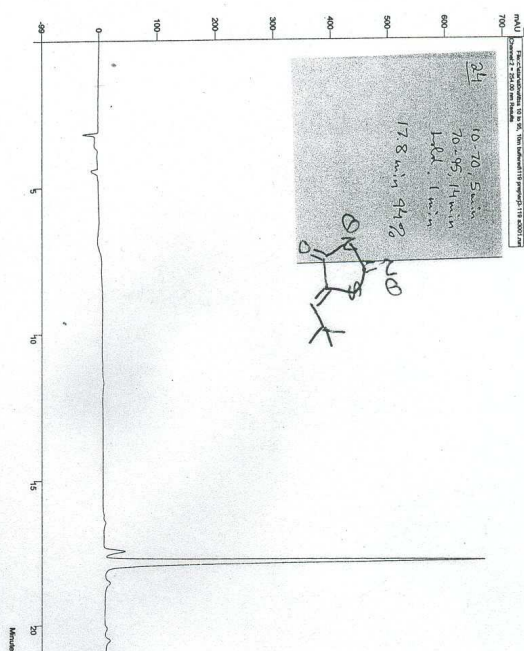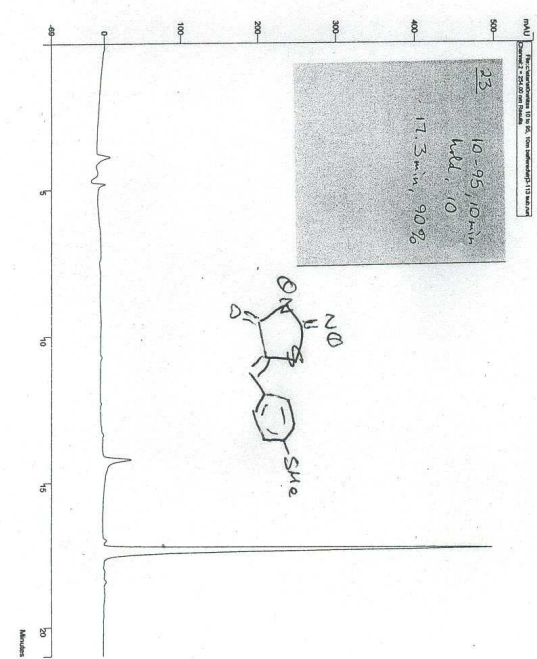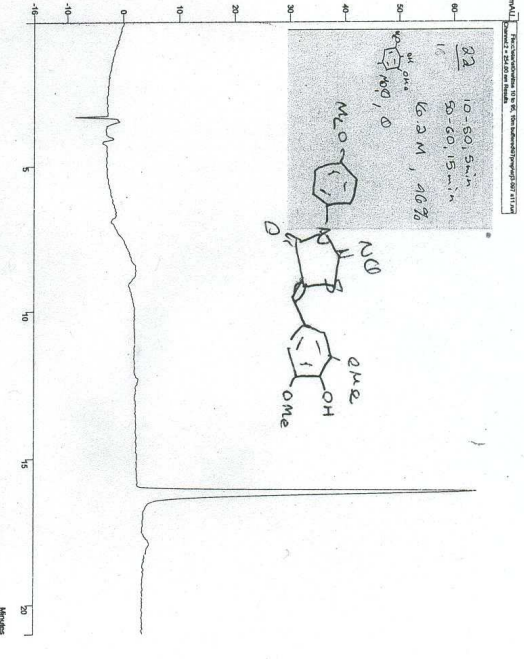

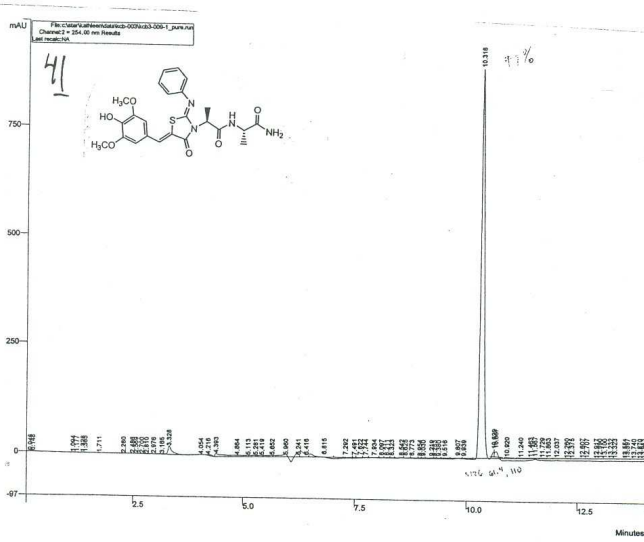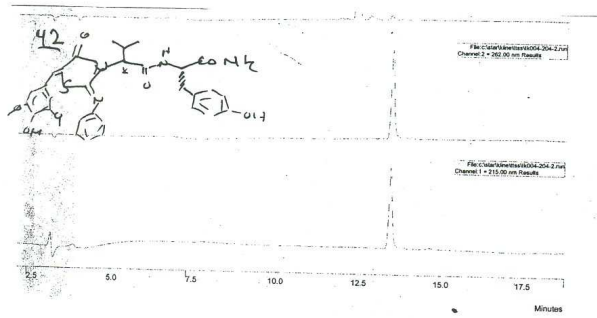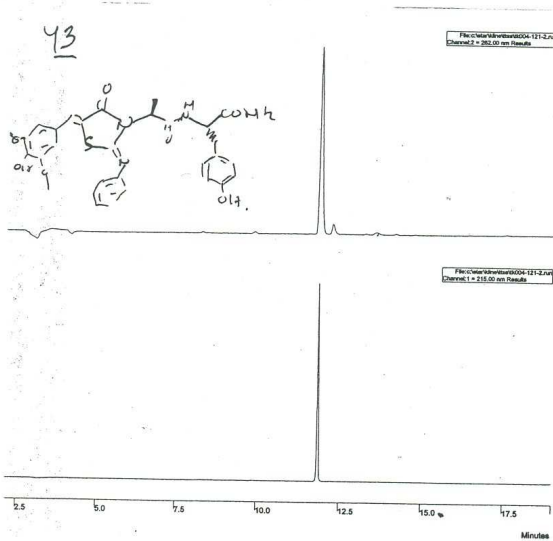



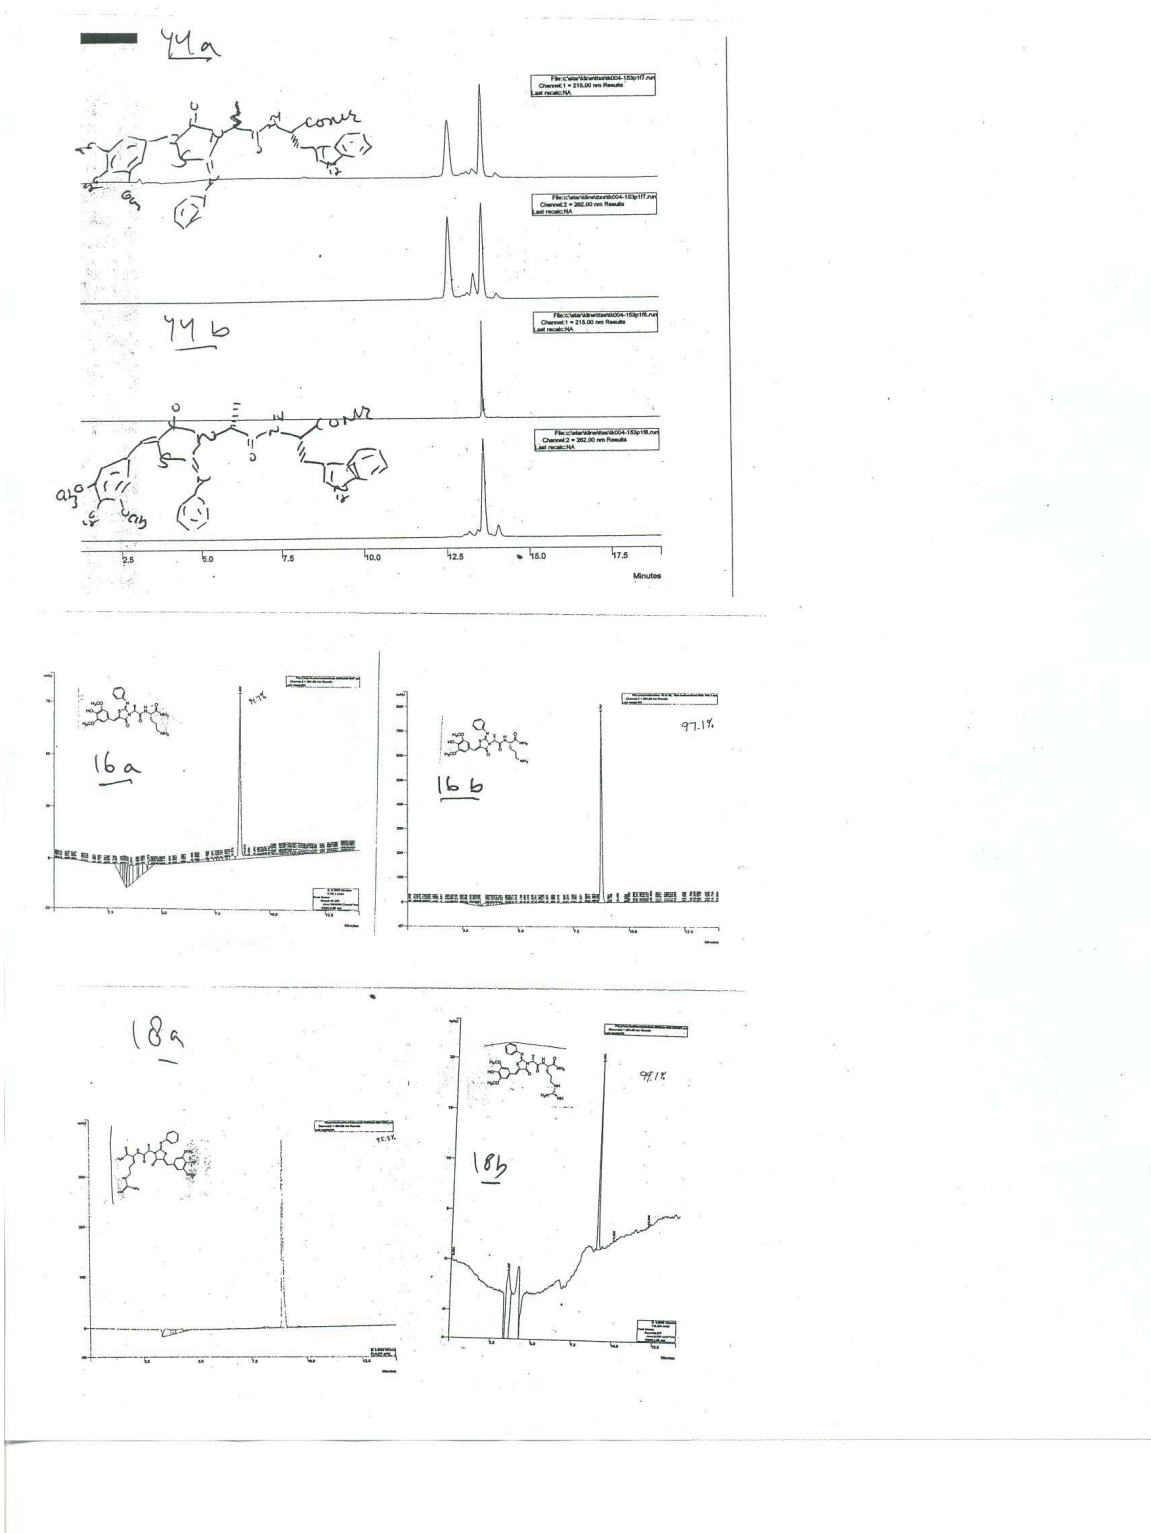





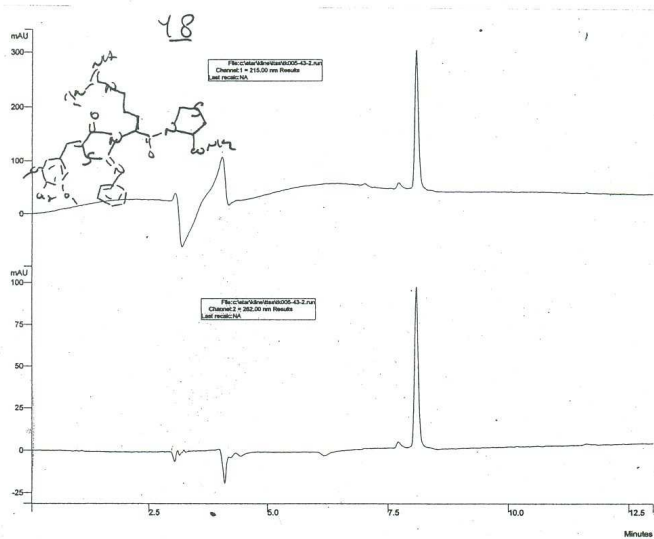

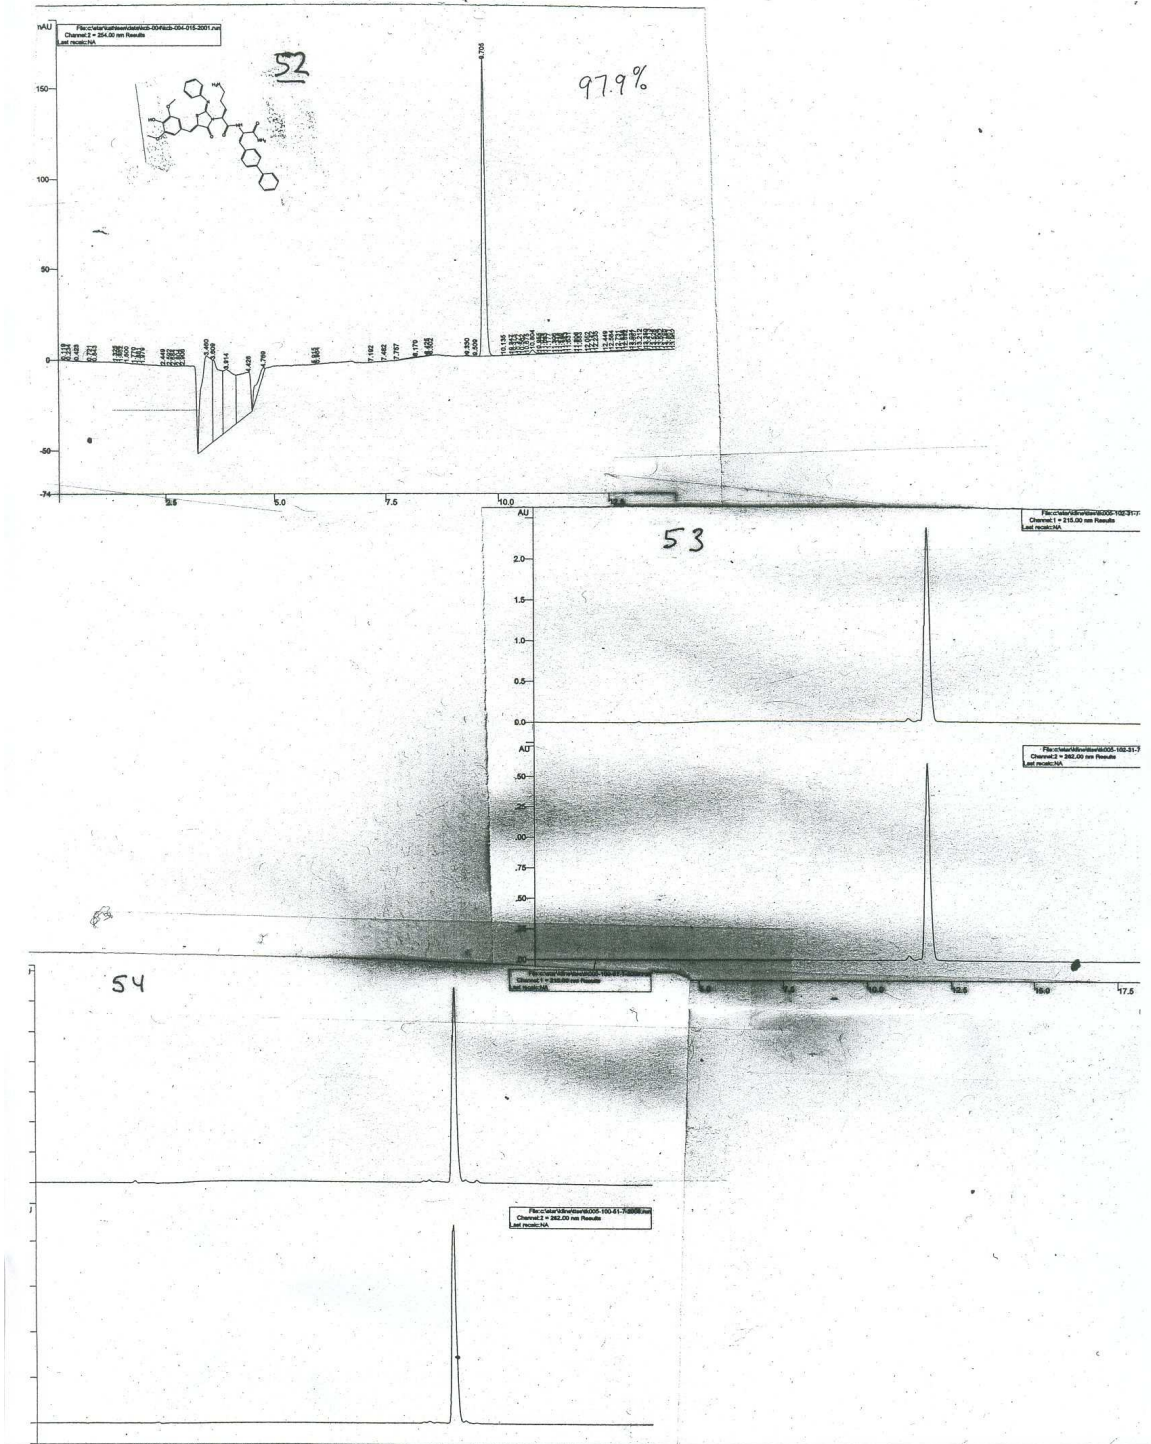

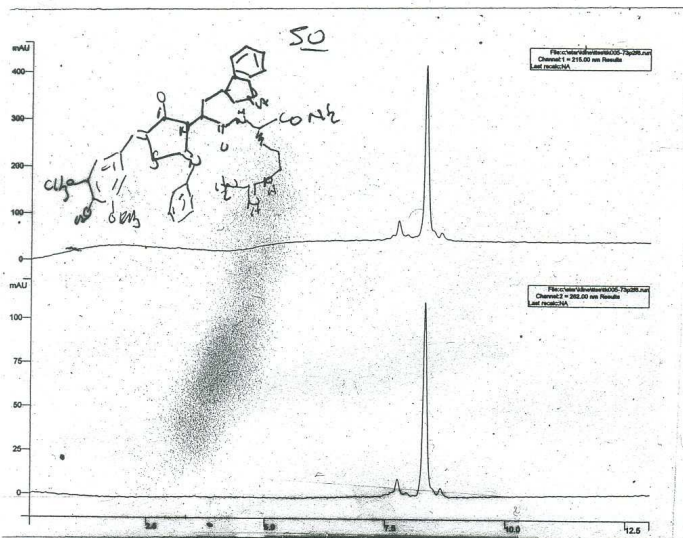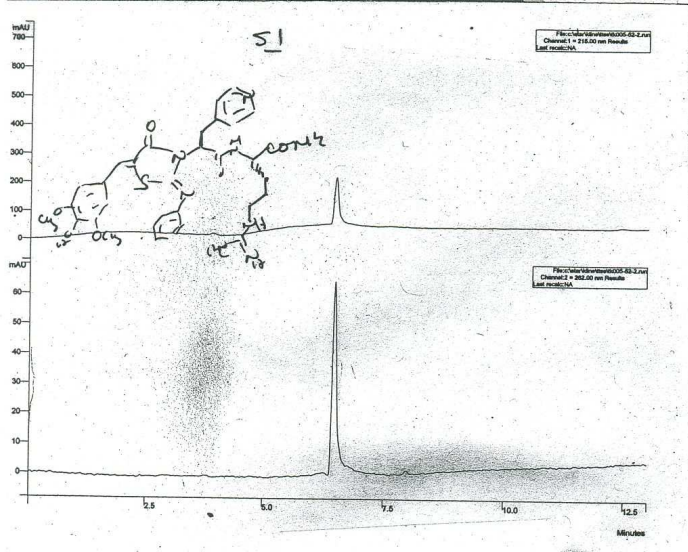

Supplement: NIHMS86553-supplement-1_si_001.pdf [file NIHMS86553-supplement-1_si_001.pdf]
